# Supplementary material for: Highly efficient carbon dioxide capture with a porous organic polymer impregnated with polyethylenimine
Source: Royal Society of Chemistry journal article supplement (doi:10.1039/c4ta02861a), 2014-01-01
Supplement: c4ta02861a1.pdf [file c4ta02861a1.pdf]

## **Supporting Information**

# **Highly Efficient Carbon Dioxide Capture with a Porous Organic Polymer Impregnated with Polyethylenimine**

*Siyoung Sung<sup>a</sup> and Myunghyun Paik Suh<sup>\*a,b</sup>*

<sup>a</sup> Department of Chemistry, Seoul National University, Seoul 151-747, Republic of Korea. E-mail: mpsuh@snu.ac.kr

<sup>b</sup> Current address: Department of Chemistry, Hanyang University, Seoul 133-791, Republic of Korea. E-mail: mpsuh@Hanyang.ac.kr

## Experimental Section

**General Methods.** All chemicals and solvents used in the syntheses were of reagents grade and used without further purification. Branched polyethylenimine (PEI, Mw, ~800) was purchased from Sigma Aldrich. 1,3,5-tris(4-bromophenyl)benzene and PAF-5 were prepared by the methods previously reported.<sup>S1,S2</sup> Infrared spectra were recorded with a Perkin-Elmer Spectrum One FT-IR spectrophotometer. Thermogravimetric analyses (TGA) were carried out under a N<sub>2</sub> stream at a scan rate of 5 °C/min, using TGA Q50 of TA instruments. Elemental analyses were performed with a Perkin-Elmer 2400 Series II CHN analyzer.

**Preparation of PAF-5 Impregnated with Polyethylenimine, PEI(x wt%)⊂PAF-5 (X= 10~40 wt%).** PAF-5 was impregnated with a branched polyethylenimine (PEI, Mw, ~800, water content ≤ 2%) by a previously reported wet impregnation method.<sup>S3</sup> Before PEI impregnation, as-synthesized PAF-5 was activated under reduced pressure at 373 K for 24 h. Various amount of PEI was dissolved in anhydrous methanol (25 mL) by stirring for 10 min, and activated PAF-5 (*ca.* 0.2 g) was added to the solution. The PAF-5 slurry in the PEI/methanol solution was stirred and sonicated under each condition shown in Table S1. Finally, the resulting slurry was filtered, washed with anhydrous methanol (10 mL x 3), and activated at 373 K under reduced pressure for 24 h. The amount of PEI impregnated in PAF-5 was determined by TGA data as well as elemental analysis data (Table S2) after activating the as-synthesized PEI(x wt%)⊂PAF-5.

**Water Stability Test.** The activated PEI(40 wt%)⊂PAF-5 (*ca.* 0.2 g) was exposed to water vapor in a closed glass bottle for 7 days at 313 K and then activated under reduced pressure at 373 K for 48 h.

**Gas Cycling Experiment.** Prior to gas cycling experiment, the sample was activated at 373 K under reduced pressure for 24 h. The activated sample was introduced to a thermogravimetric apparatus under N<sub>2</sub>, and then the CO<sub>2</sub> gas cycling experiments were performed at 313 K on a TGA Q50 by using a stream of 15% (v/v) CO<sub>2</sub> in N<sub>2</sub> and a stream of 15% (v/v) CO<sub>2</sub> in He, followed by a stream of pure N<sub>2</sub>. A flow rate of the gas was 60 mL/min.

**Low Pressure Gas Sorption Measurements.** The gas adsorption-desorption experiments were performed by using an automated micropore gas analyzer Autosorb-3B (Quantachrome Instruments). All gases used were of 99.9999% purity. Gas sorption isotherms for N<sub>2</sub> were monitored at 77, 298, 313, and 323 K, and CO<sub>2</sub> gas sorption isotherms

were conducted at 298, 313, and 323 K at each equilibrium pressure by the static volumetric method. An exactly measured amount of the solid, which was activated at 373 K under reduced pressure, was introduced into the gas-sorption apparatus and the sample was reactivated at 373 K under high vacuum ( $10^{-4}$  atm) for 1 h. After each gas sorption measurement, the sample was precisely weighed again. From the  $N_2$  gas isotherms at 77 K, surface area, pore size distribution, and pore volume were calculated. Multipoint BET surface area was estimated by using the data recorded at  $P/P_0 = 0.005 - 0.1$  atm. The pore size distribution and pore volume were calculated from non-local density functional theory (NLDFT) applying the model of carbon as an adsorbent and slit pore.

**Calculation of Isothermic Heat of CO<sub>2</sub> Adsorption.** Pressure as a function of the amount of adsorbed CO<sub>2</sub> was determined by fitting the adsorption isotherms measured at 298, 313, and 323 K to the dual-site Langmuir equation (eq 1). In eq 1,  $P$  is pressure (atm),  $N$  is the amount adsorbed gas (mmol g<sup>-1</sup>),  $N_m$  is the amount of adsorbed gas at saturation, and  $b$  is a constant. The isosteric heat ( $Q_{st}$ ) of the CO<sub>2</sub> adsorption was calculated by applying these fits to the Clausius-Clapeyron equation (eq 2).<sup>S4</sup>

$$N = \frac{N_{m,A} b_A P}{1 + b_A P} + \frac{N_{m,B} b_B P}{1 + b_B P} \quad (1)$$

$$\frac{\partial(\ln P)}{\partial(1/T)} = -\frac{Q_{st}}{R} \quad (2)$$

## References

- S1. Y. Zhao, J. Li, C. Li, K. Yin, D. Ye and X. Jia, *Green. Chem.*, 2010, **12**, 1370.  
 S2. H. Ren, T. Ben, F. Sun, M. Guo, X. Jing, H. Ma, K. Cai, S. Qiu and G. Zhu, *J. Mater. Chem.*, 2011, **21**, 10348.  
 S3. X. Xu, C. Song, J. M. Andresen, B. G. Miller and A. W. Scaroni, *Energy Fuels*, 2002, **16**, 1463.  
 S4. L. Czepirski and J. Jagiello, *Chem. Eng. Sci.*, 1989, **44**, 797.

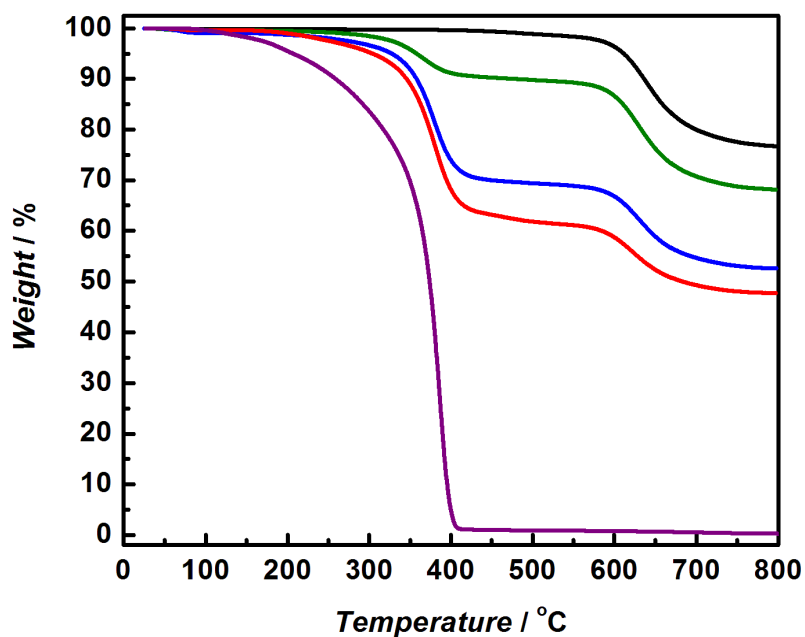

**Figure S1.** TGA traces for **PAF-5** (black), **PEI(10 wt%)@PAF-5** (green), **PEI(30 wt%)@PAF-5** (blue), **PEI(40 wt%)@PAF-5** (red), and pure **PEI** (purple) .

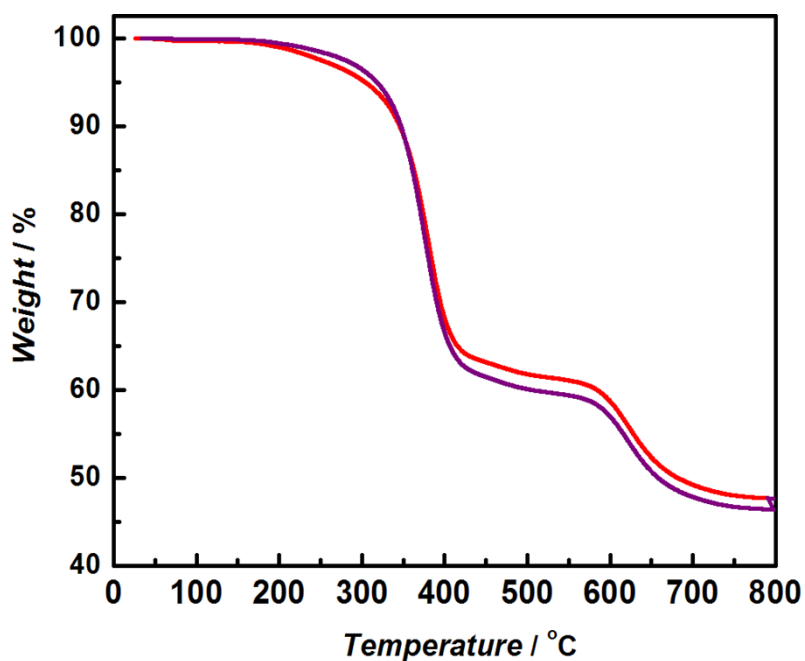

**Figure S2.** TGA traces for **PEI(40 wt%)@PAF-5** a) before (red) and b) after (purple) exposure to water vapor at 313 K for 7 days followed by activation at 373 K under vacuum for 48 hours.

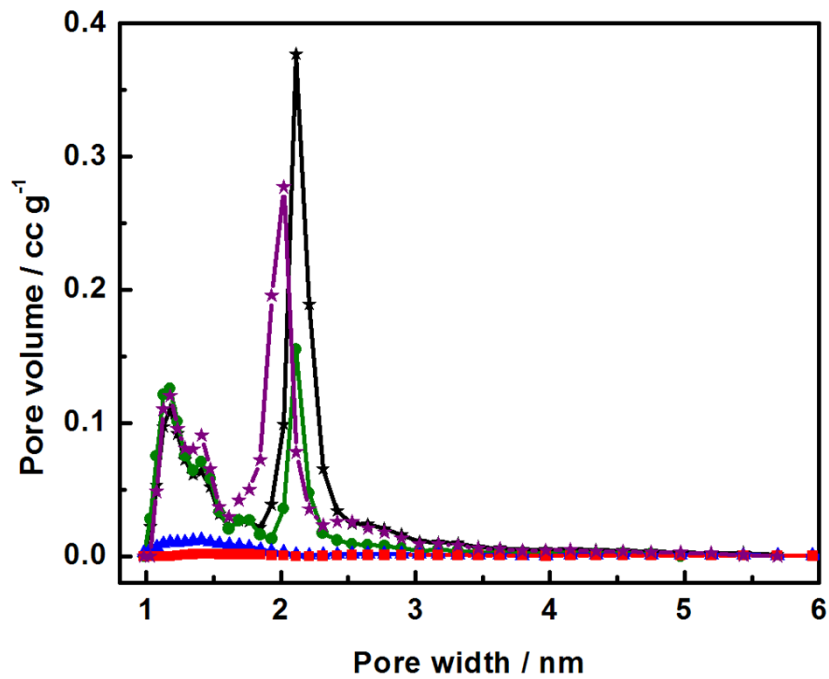

**Figure S3.** Pore width distributions of PAF-5 (heat-vacuum activation) (★), PAF-5 (supercritical CO<sub>2</sub> drying activation) (★), PEI(10 wt%)@PAF-5 (●), PEI(30 wt%)@PAF-5 (▲), and PEI(40 wt%)@PAF-5 (■), calculated from non-local density functional theory (NLDFT) applying the model of carbon as an adsorbent and slit pore.

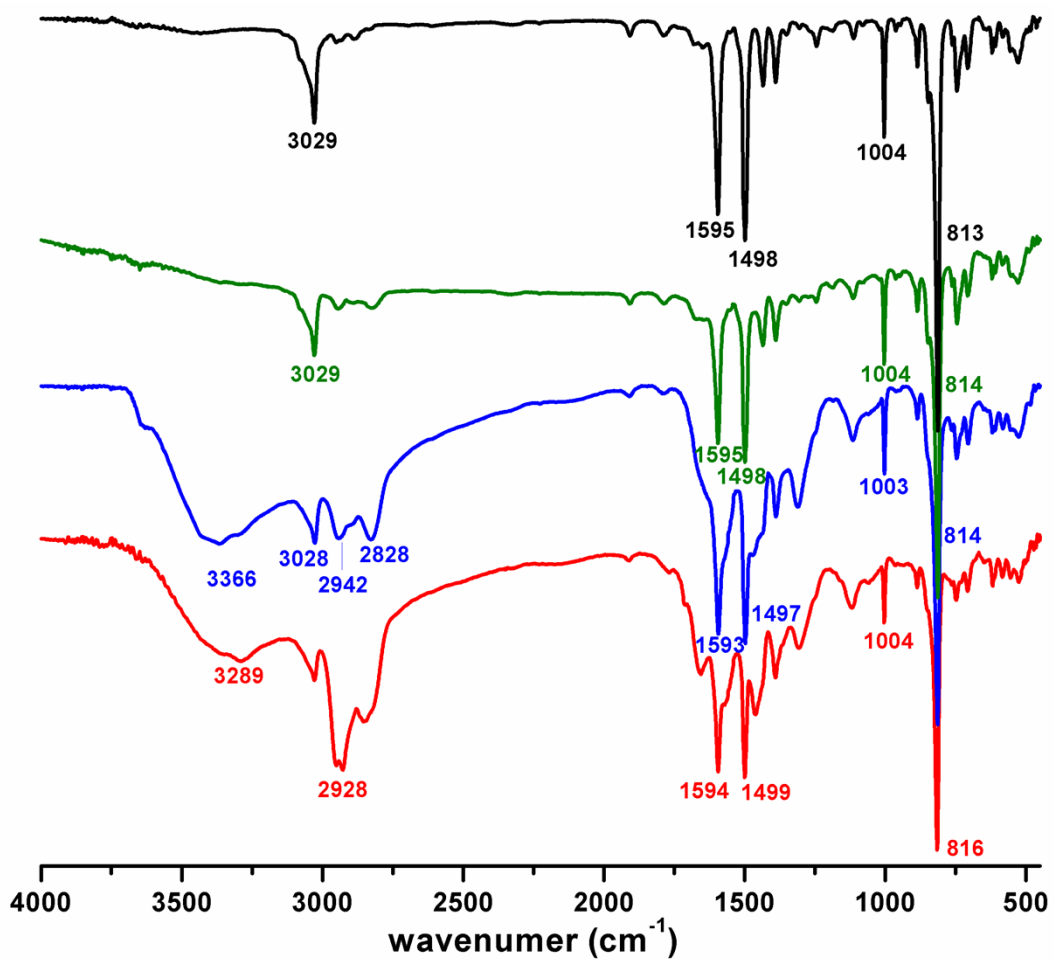

**Figure S4.** IR spectra of PAF-5 (black), PEI(10 wt%) $\subset$ PAF-5 (green), PEI(30 wt%) $\subset$ PAF-5 (blue), and PEI(40 wt%) $\subset$ PAF-5 (red).

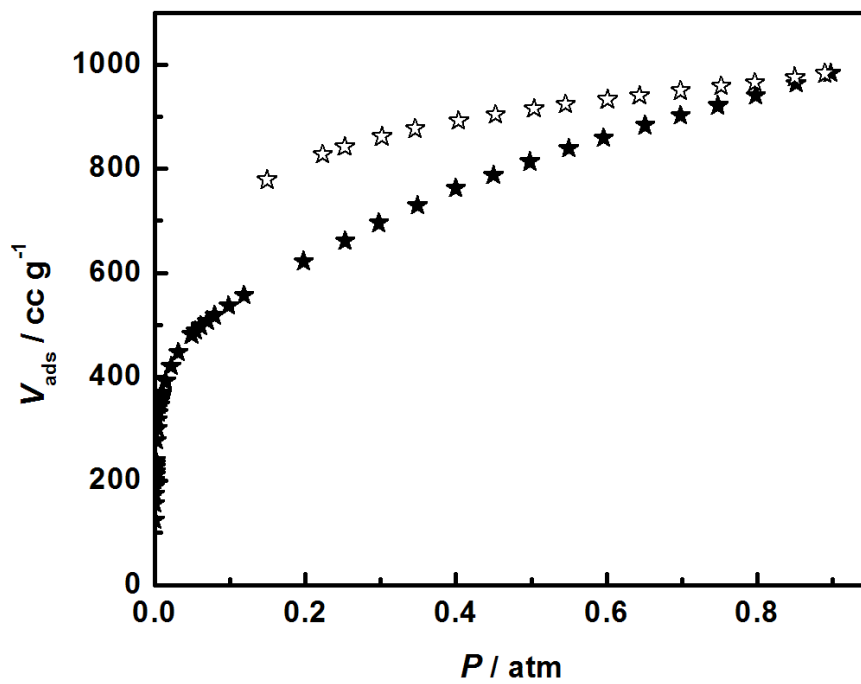

**Figure S5.**  $\text{N}_2$  gas adsorption and desorption isotherms measured at 77 K: **PAF-5** (★) activated by  $\text{CO}_2$  supercritical drying method.

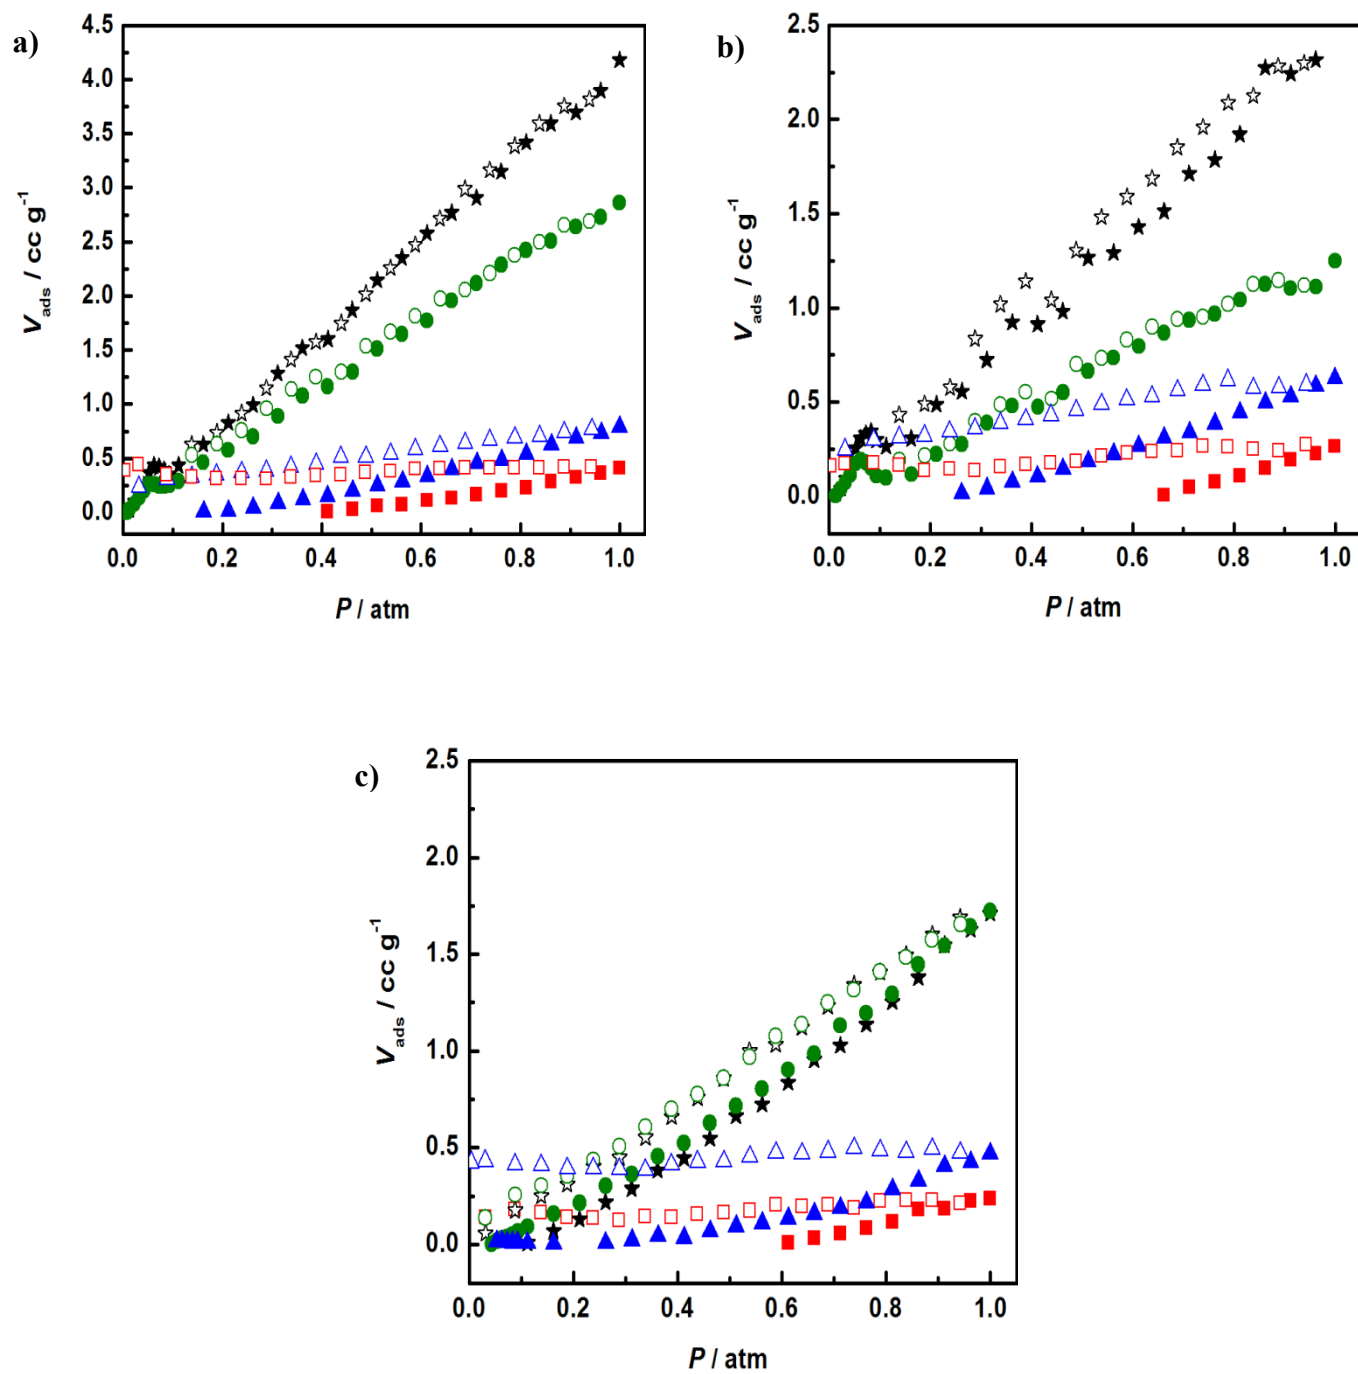

**Figure S6.** N<sub>2</sub> gas adsorption and desorption isotherms measured at a) 298 K, b) 313 K, and c) 323 K for PAF-5 (★), PEI(10 wt%)@PAF-5 (●), PEI(30 wt%)@PAF-5 (▲), and PEI(40 wt%)@PAF-5 (■).



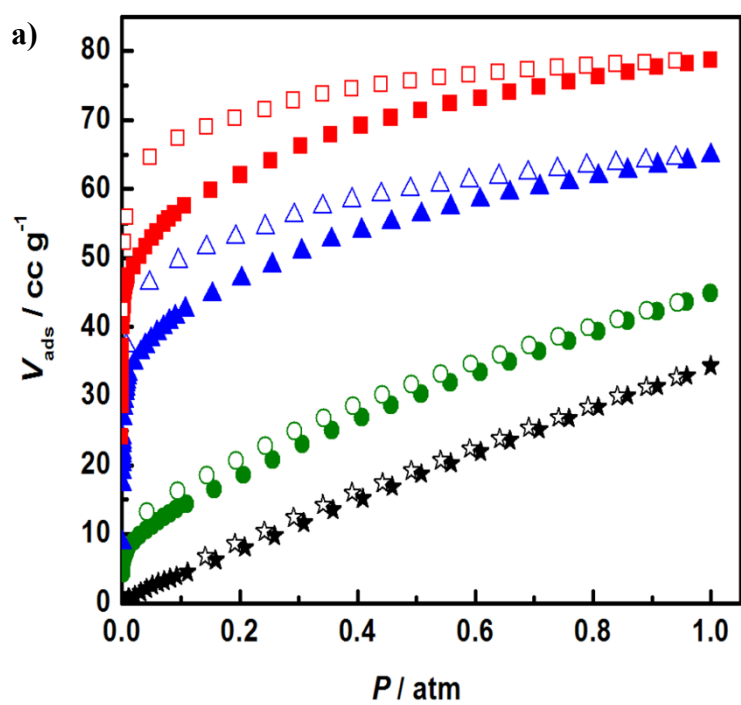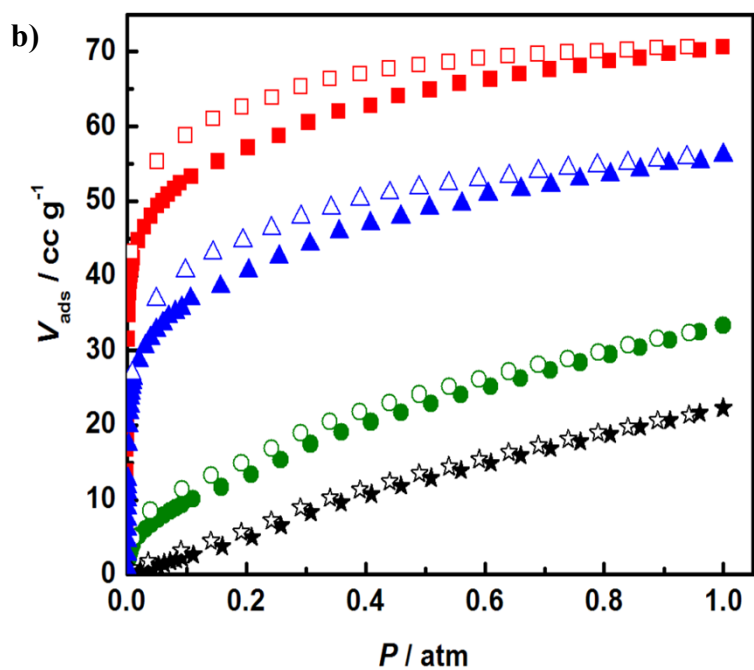

**Figure S7.** CO<sub>2</sub> gas adsorption and desorption isotherms measured at a) 298 K and b) 323 K for PAF-5 (★), PEI(10 wt%)@PAF-5 (●), PEI(30 wt%)@PAF-5 (▲), and PEI(40 wt%)@PAF-5 (■).

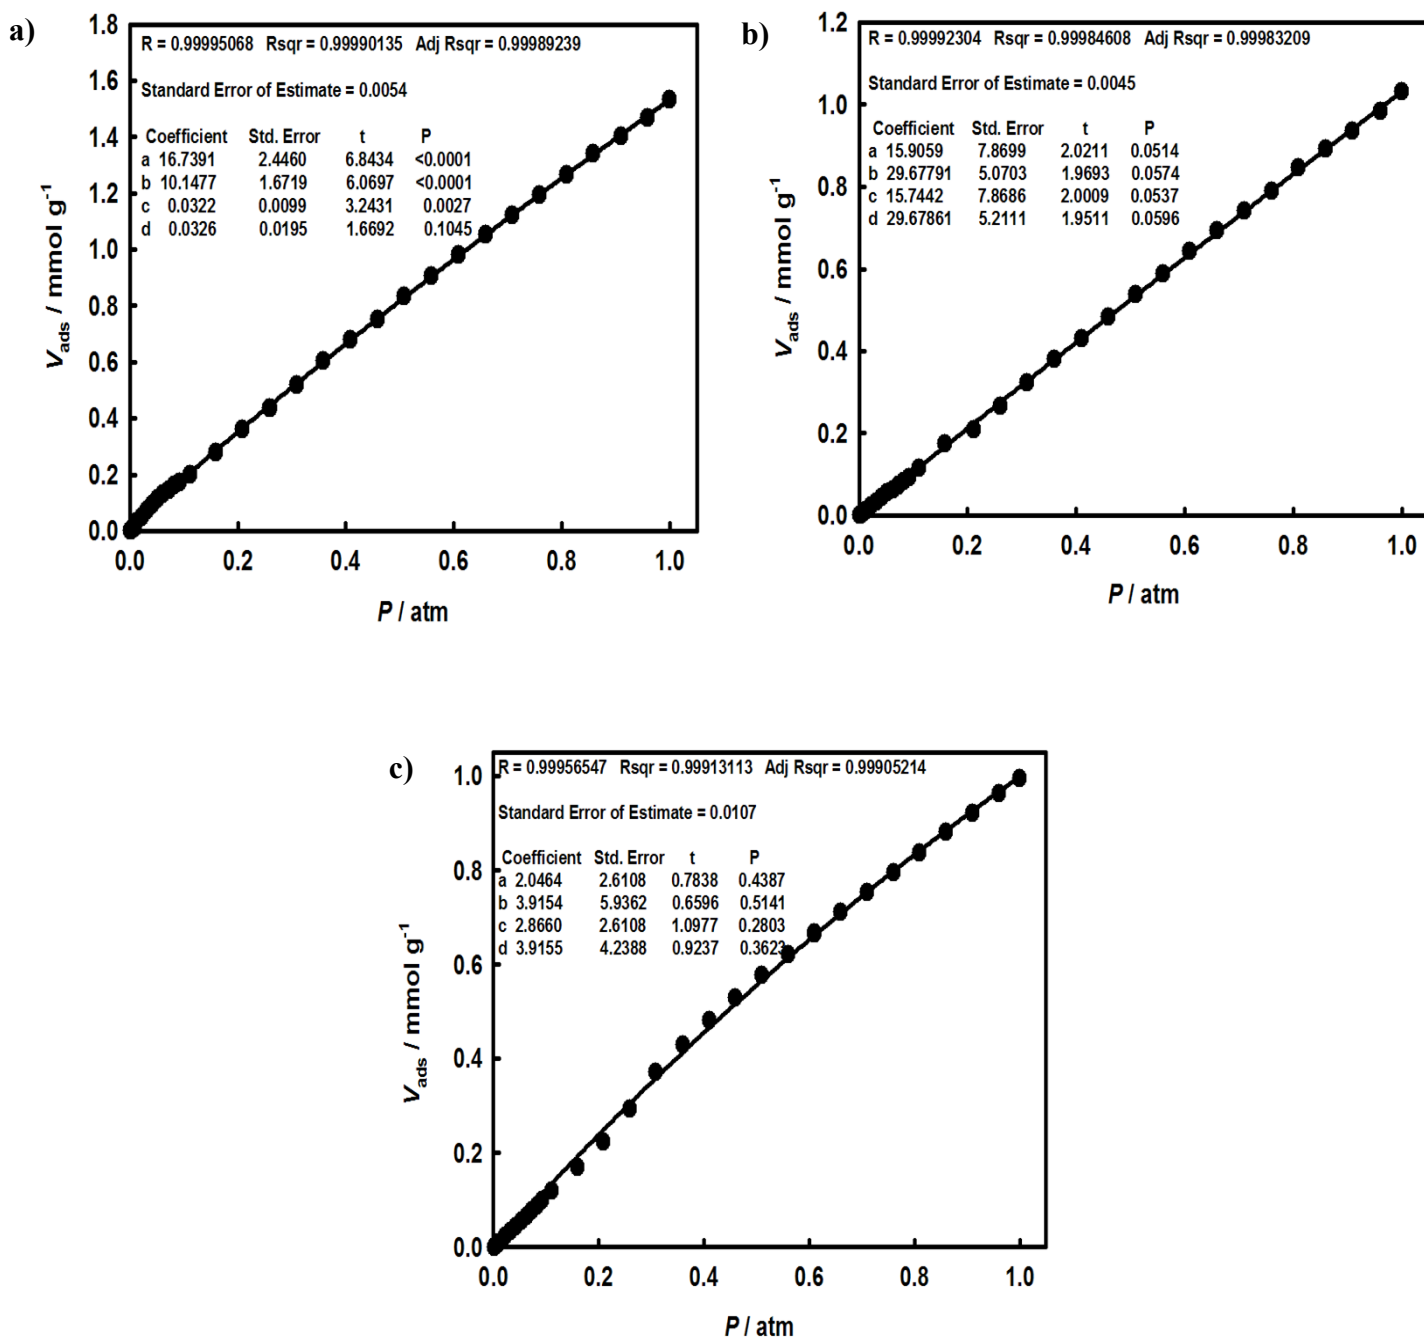

**Figure S8.** CO<sub>2</sub> gas adsorption isotherms of PAF-5 measured at a) 298 K, b) 313 K, and c) 323 K. The solid line corresponds to dual-site Langmuir equation fit. Coefficients a, b, c, and d inside of the figures correspond to the values of  $N_{m,A}b_A$ ,  $b_A$ ,  $N_{m,B}b_B$ , and  $b_B$ , respectively, obtained for the dual-site Langmuir equation (eq. 1), which is described in the experimental section.

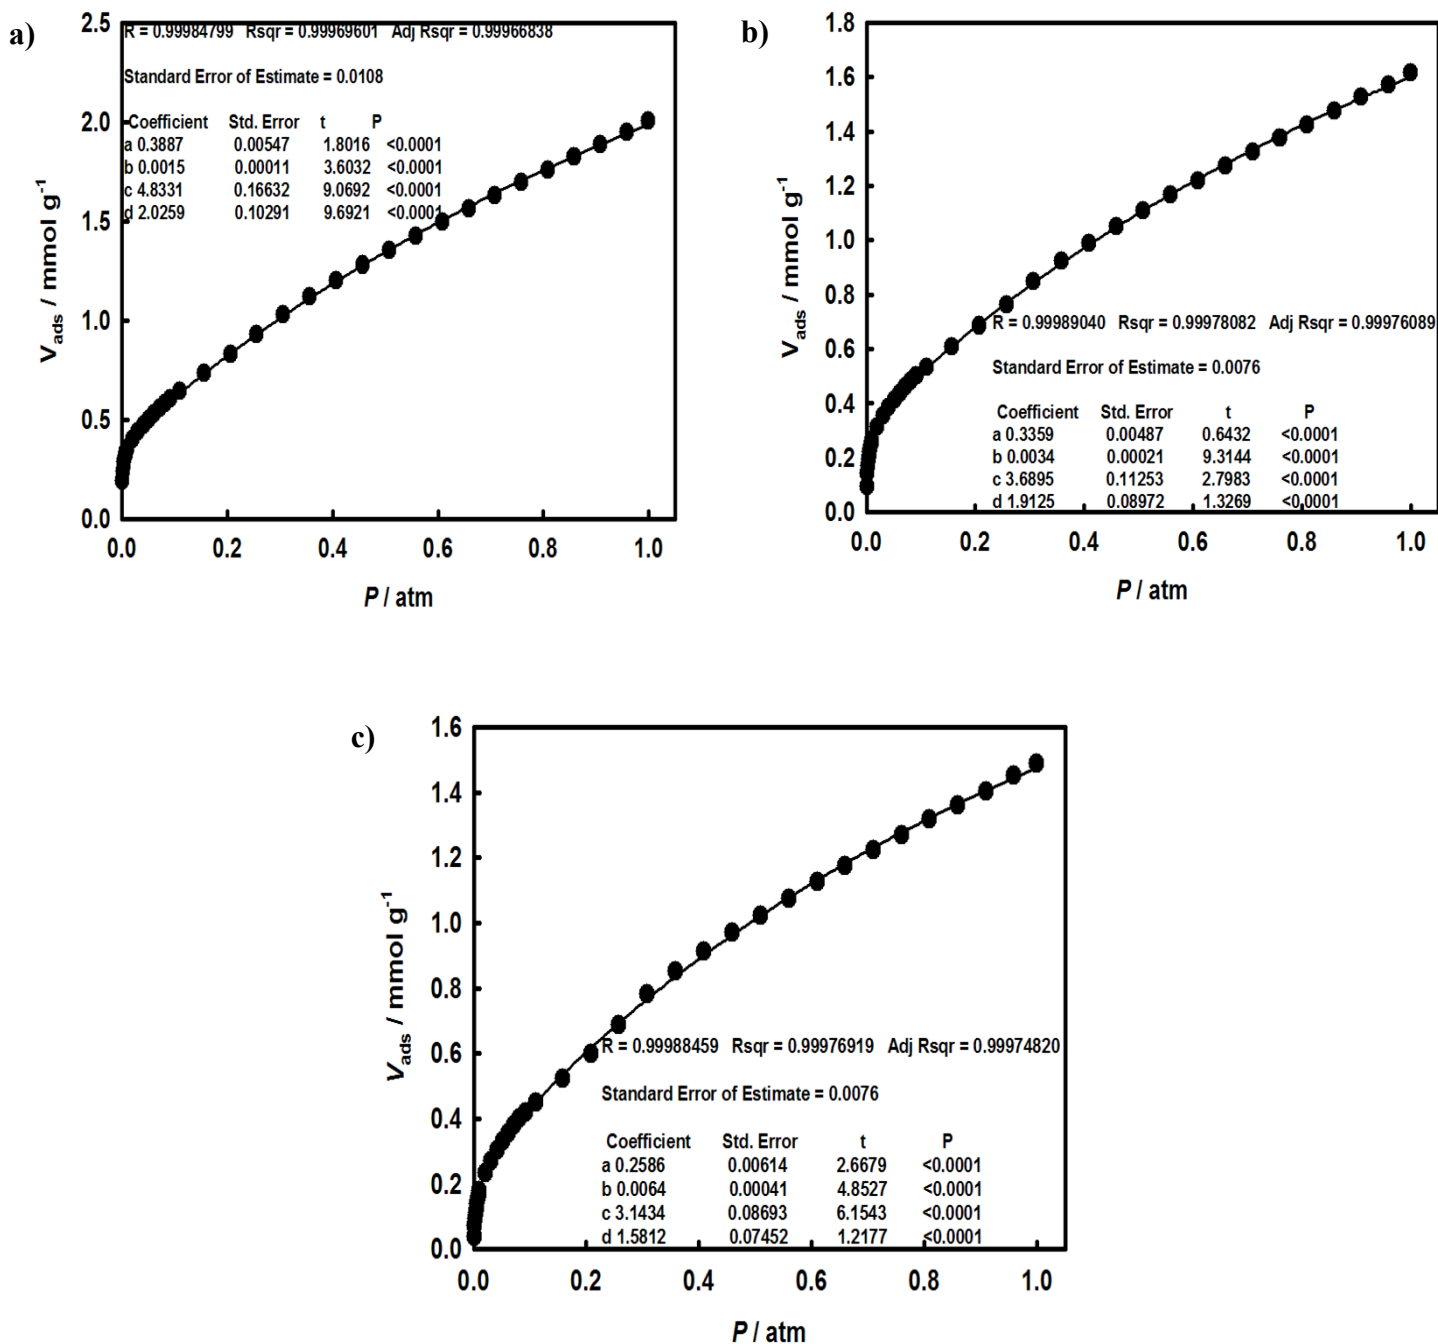

**Figure S9.** CO<sub>2</sub> gas adsorption isotherms of PEI(10 wt%)@PAF-5 measured at a) 298 K, b) 313 K, and c) 323 K. The solid line corresponds to dual-site Langmuir equation fit. Coefficients a, b, c, and d inside of the figures correspond to the values of  $N_{m,A}b_A$ ,  $b_A$ ,  $N_{m,B}b_B$ , and  $b_B$ , respectively, obtained for the dual-site Langmuir equation (eq. 1), which is described in the experimental section.

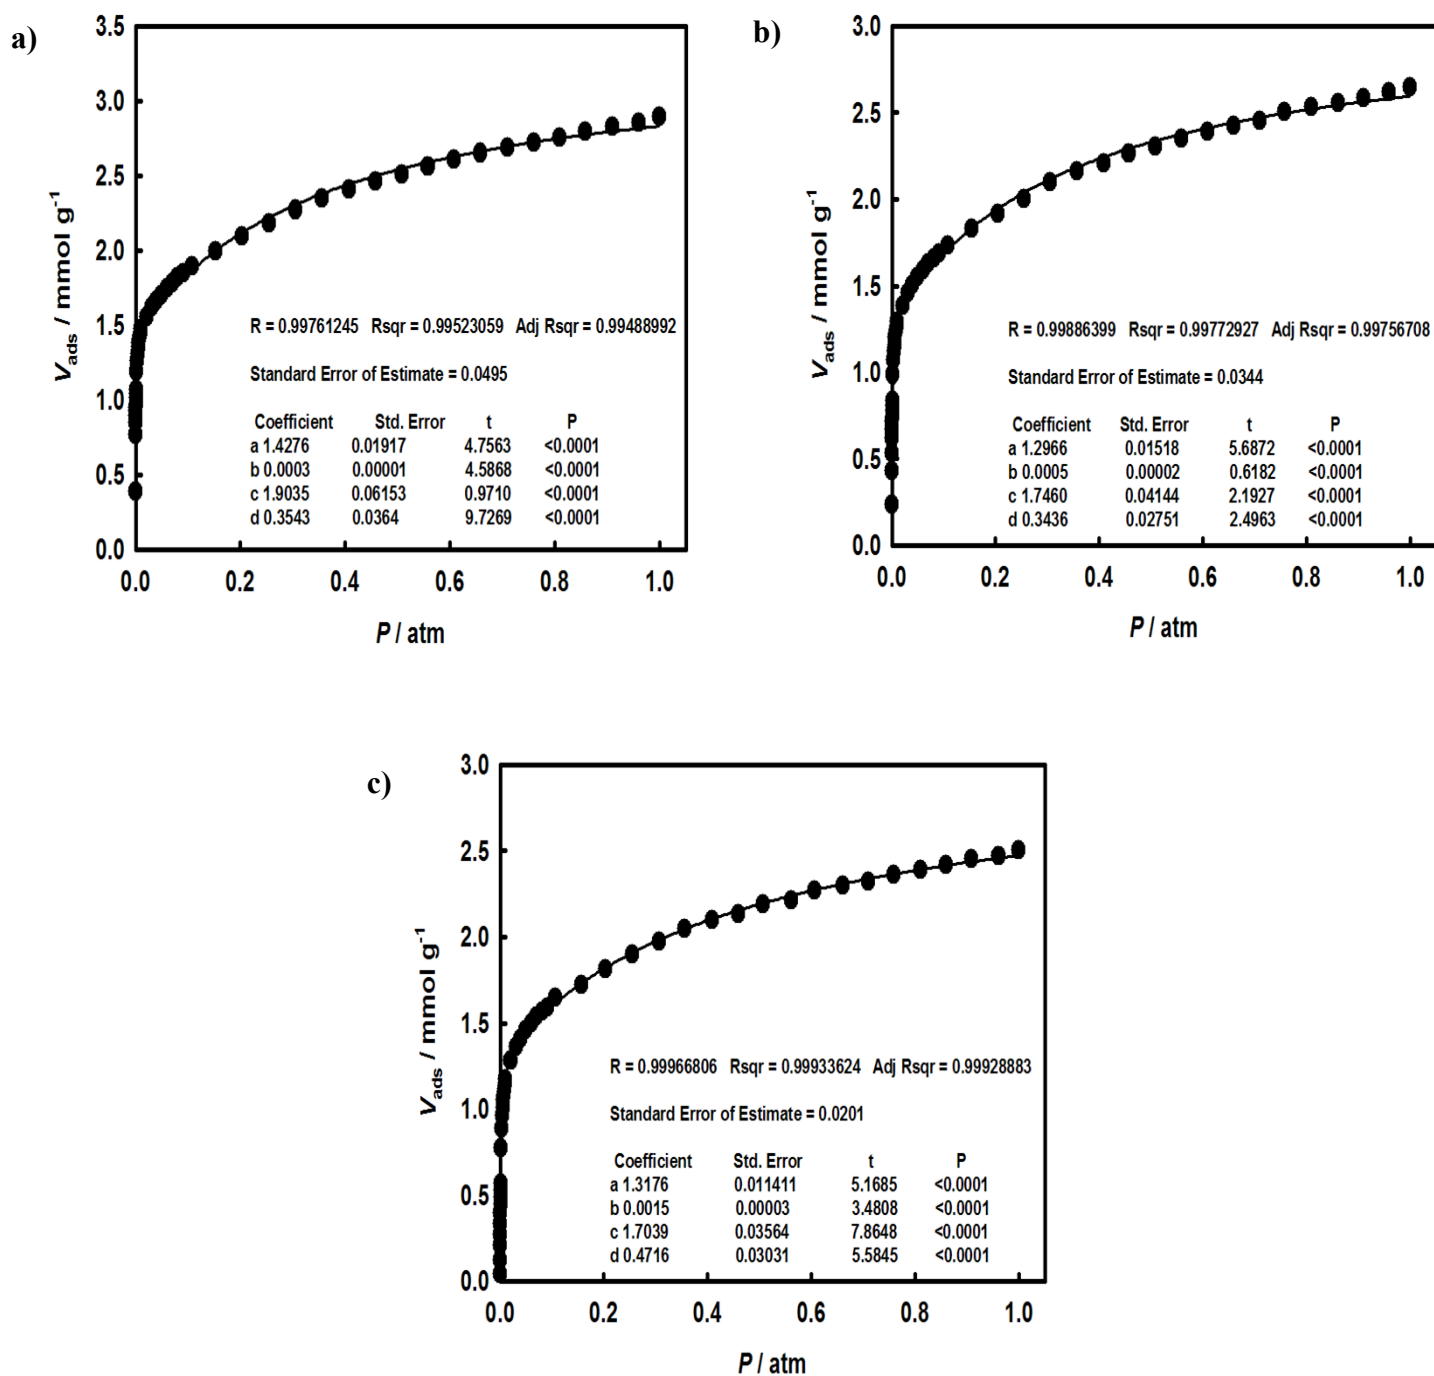

**Figure S10.** CO<sub>2</sub> gas adsorption isotherms of PEI(30 wt%)@PAF-5 measured at a) 298 K, b) 313 K, and c) 323 K. The solid line corresponds to dual-site Langmuir equation fit. Coefficients a, b, c, and d inside of the figures correspond to the values of  $N_{m,A}b_A$ ,  $b_A$ ,  $N_{m,B}b_B$ , and  $b_B$ , respectively, obtained for the dual-site Langmuir equation (eq. 1), which is described in the experimental section.

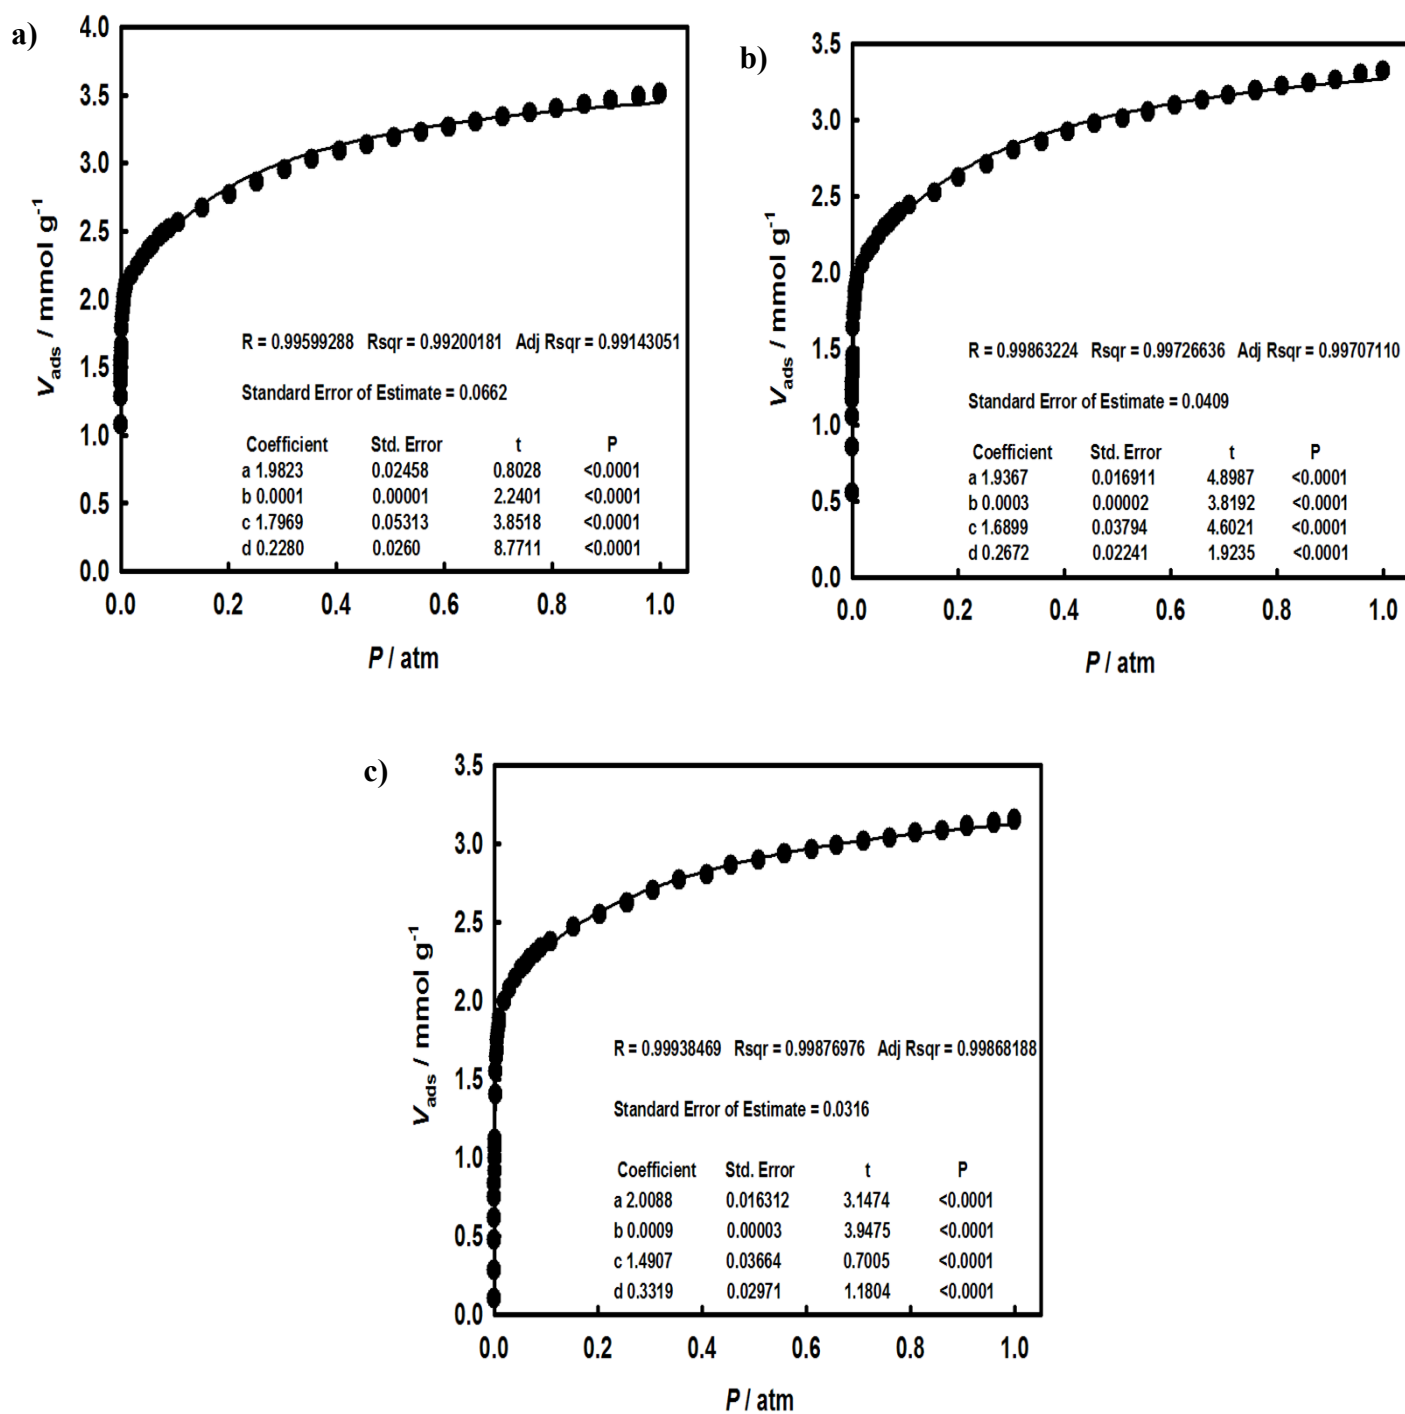

**Figure S11.** CO<sub>2</sub> gas adsorption isotherms of PEI(40 wt%)@PAF-5 measured at a) 298 K, b) 313 K, and c) 323 K. The solid line corresponds to dual-site Langmuir equation fit. Coefficients a, b, c, and d inside of the figures correspond to the values of  $N_{m,A}b_A$ ,  $b_A$ ,  $N_{m,B}b_B$ , and  $b_B$ , respectively, obtained for the dual-site Langmuir equation (eq. 1), which is described in the experimental section.

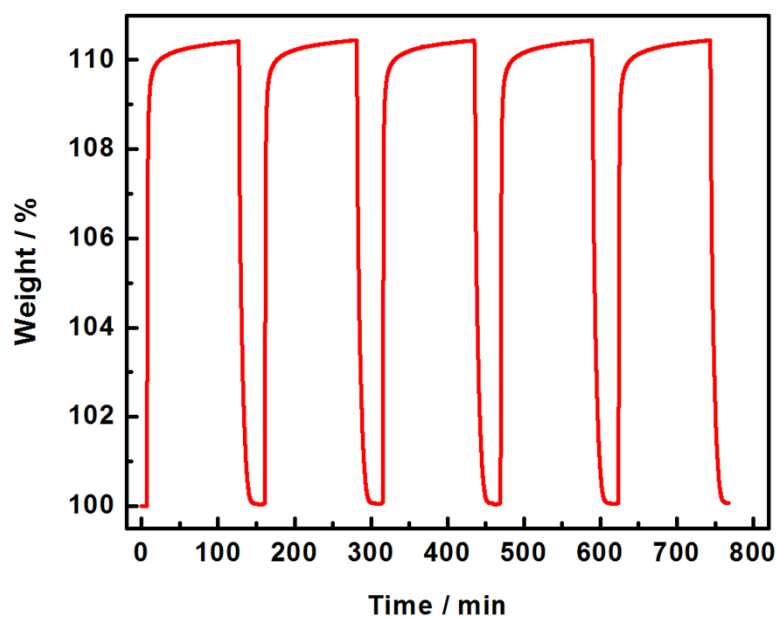

**Figure S12.** Gas cycling data of PEI(40 wt%)@PAF-5 under a flow of 15% CO<sub>2</sub> (v/v) in N<sub>2</sub> at 313 K. 120 minutes and 20 minutes of adsorption and desorption time were given respectively. For desorption process, temperature was elevated to 343 K under a N<sub>2</sub> flow.

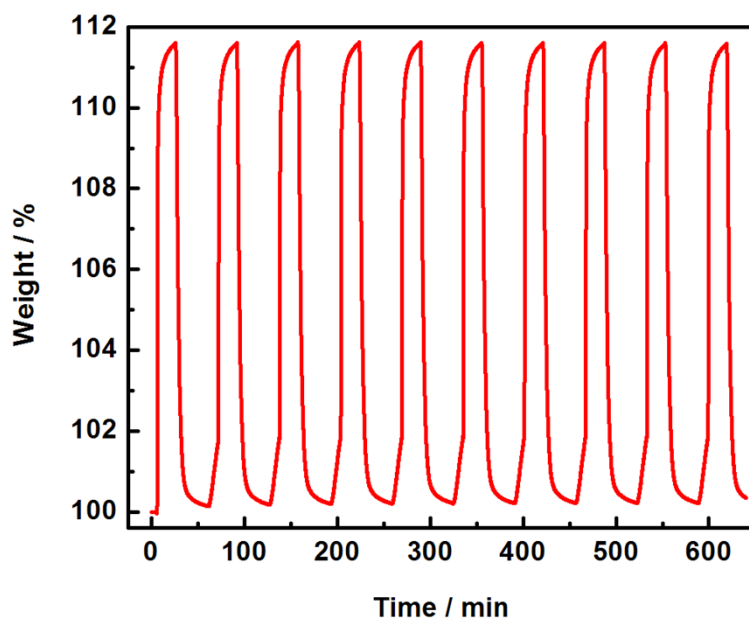

**Figure S13.** Gas cycling data of PEI(40 wt%)@PAF-5 under a flow of 15% CO<sub>2</sub> (v/v) in He at 313 K. 20 minutes and 30 minutes of adsorption and desorption time were given respectively. For desorption process, temperature was elevated to 353 K under a N<sub>2</sub> flow.

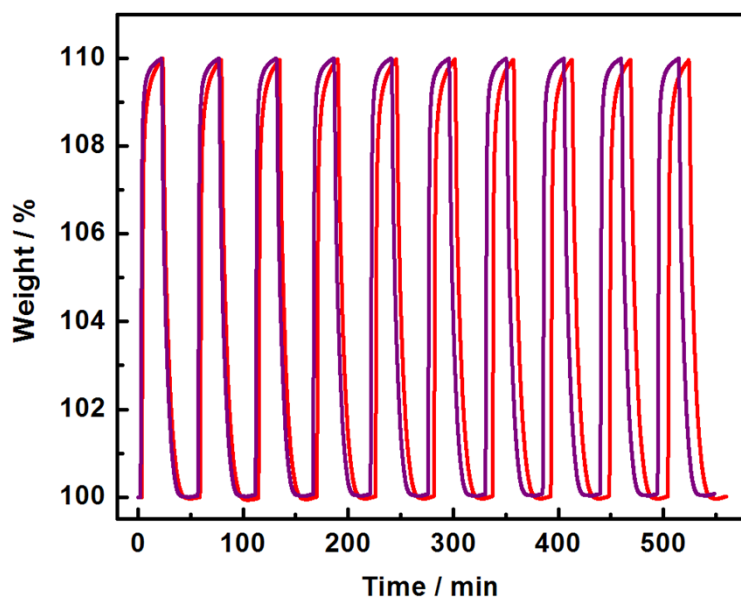

**Figure S14.** Gas cycling data of PEI(40 wt%)@PAF-5 before (red) and after (purple) water vapor-exposure for 7 days at 313 K followed by activation at 373 K under vacuum for 48 h. The experiments were performed under a flow of 15% CO<sub>2</sub> (v/v) in N<sub>2</sub> at 313 K, followed by a N<sub>2</sub> stream at 343 K. 20 minutes of adsorption and desorption time were given.

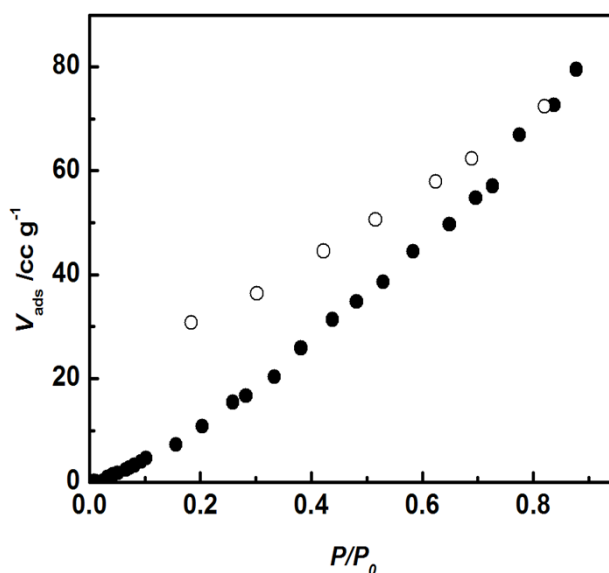

**Figure S15.** Water vapor adsorption and desorption isotherms of PEI(40 wt%)@PAF-5 measured at 313 K. The sample adsorbed 5.0 wt% of water vapor at  $P/P_0 = 0.68$ , which corresponds to 0.05 atm of water vapor pressure in the post-combustion flue gas.

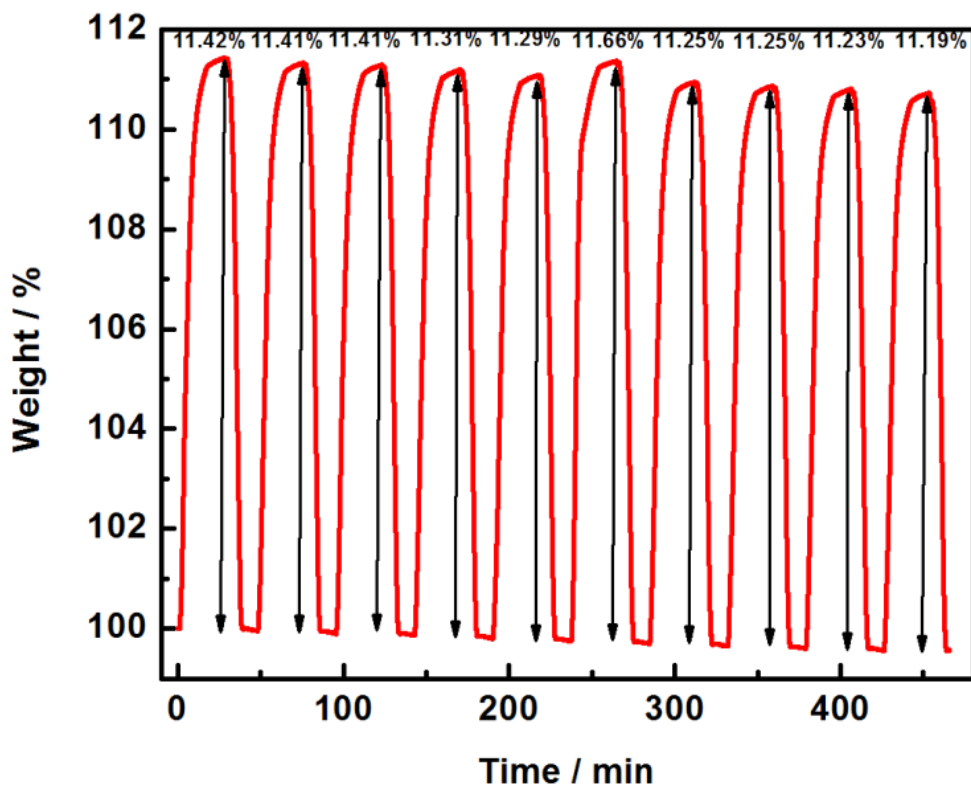

**Figure S16.** Weight change in each cycle of temperature swing adsorption (TSA) processes for PEI(40 wt%)@PAF-5. A stream of 15% CO<sub>2</sub> (v/v) in N<sub>2</sub> was applied at 313 K for 10 minutes and then the temperature was increased to 413 K at a rate of 10 K/min under a stream of 1 atm CO<sub>2</sub>. For the complete regeneration of the sample, the temperature of 413 K was maintained for another 10 minutes. As seen in the figure, the material hardly loses its CO<sub>2</sub> adsorption capacity: during the 10 cycles of TSA, the CO<sub>2</sub> uptake capacities slightly fluctuated, showing the highest amount of CO<sub>2</sub> (11.7 wt%) adsorption in the 6<sup>th</sup> cycle. However, the difference of the CO<sub>2</sub> uptake capacities between the first and 10<sup>th</sup> cycle is only 0.23 wt%.



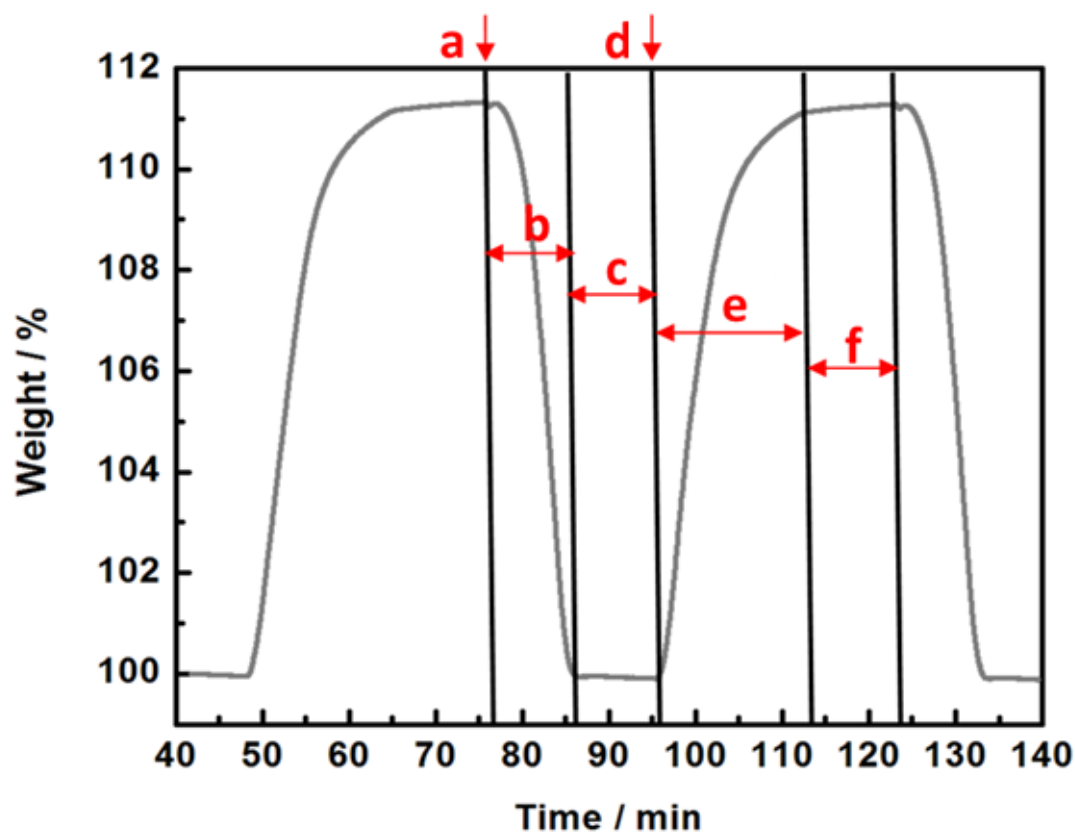

**Figure S17.** Detailed procedures (second and third cycles) in temperature swing adsorption (TSA) of PEI(40 wt%)@PAF-5.

- a. Gas stream was switched from a stream of 15% CO<sub>2</sub> (v/v) in N<sub>2</sub> to a pure CO<sub>2</sub> stream.
- b. Temperature was raised from 313 K to 413 K at a rate of 10 K/min under a pure CO<sub>2</sub> stream.
- c. Temperature was maintained at 413 K for another 10 minutes under a pure CO<sub>2</sub> stream.
- d. Gas stream was switched from a pure CO<sub>2</sub> stream to a stream of 15% CO<sub>2</sub> (v/v) in N<sub>2</sub>
- e. Temperature was lowered from 413 K to 313 K under a stream of 15% CO<sub>2</sub> (v/v) in N<sub>2</sub>.
- f. Temperature was maintained at 313 K for another 10 minutes under a stream of 15% CO<sub>2</sub> (v/v) in N<sub>2</sub>.

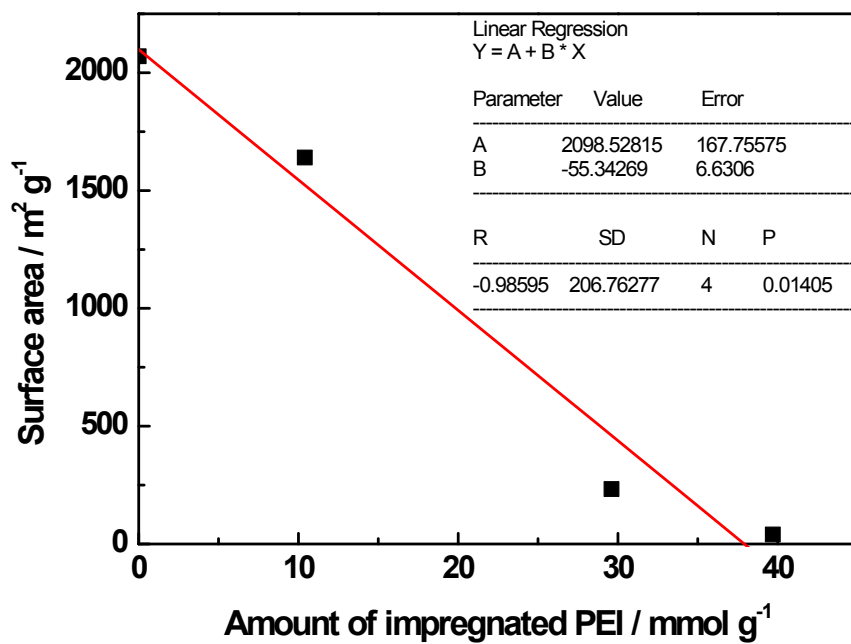

**Figure S18.** Correlation of the amount of impregnated PEI and the surface areas of PEI(40 wt%)@PAF-5. Maximum amount of impregnated PEI can be obtained from the x-intercept (38 wt%).

(a)

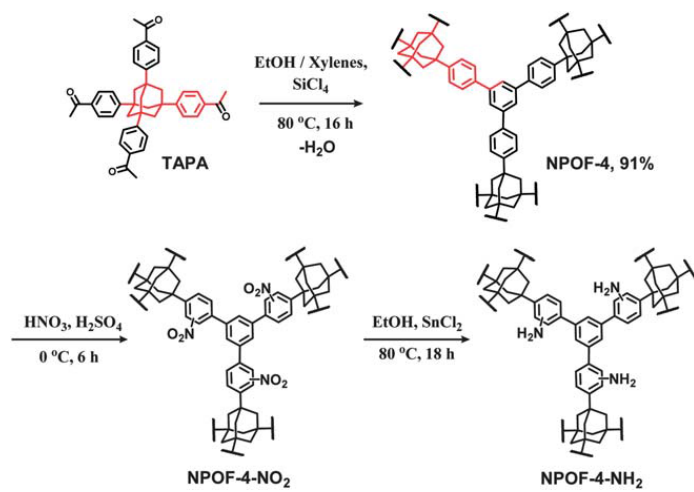

(b)

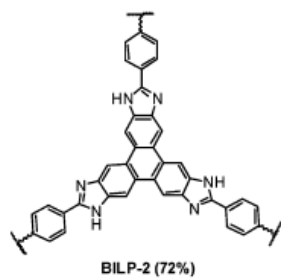

(c)

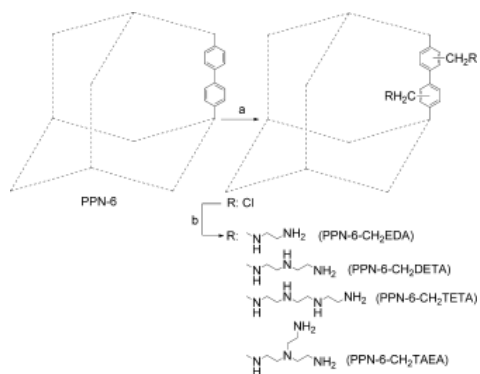

(d)

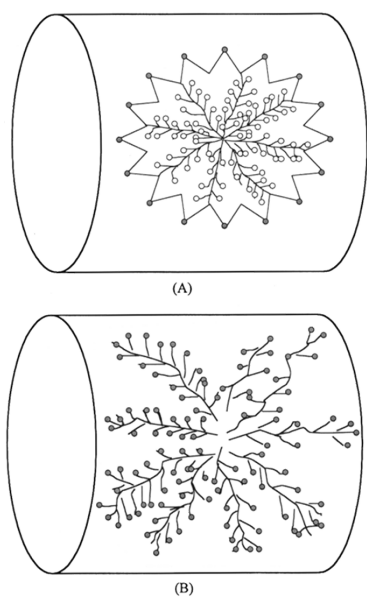

(f)

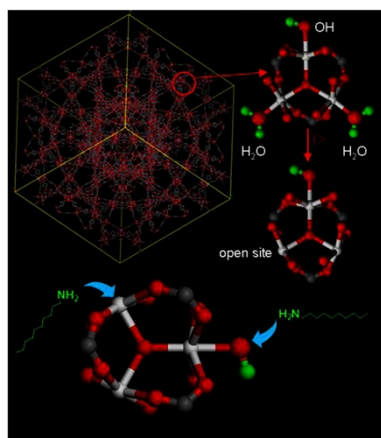

**Figure S19.** Schematic representation of (a) NPOF-4<sup>S5</sup>, (b) BILP-2<sup>S6</sup>, (c) PPN-6-CH<sub>2</sub>DETA<sup>S7</sup>, (d) MCM-41<sup>S8</sup>, (e) PEI/Zr11-SBA-15<sup>S9</sup>, and (f) PEI-MIL-101-125<sup>S10</sup>.

## References

- S5. T. Islamoglu, M. G. Rabbani and H. M. El-Kaderi, *J. Mater. Chem.A*, 2013, **1**, 10259-10266.
- S6. M. G. Rabbani and H. M. El-Kaderi, *Chem. Mater.*, 2012, **24**, 1511-1517.
- S7. W. Lu, J. P. Sculley, D. Yuan, R. Krishna, Z. Wei and H. C. Zhou, *Angew. Chem. Int. Ed.*, 2012, **51**, 7480-7484.
- S8. X. Xu, C. Song, J. M. Andresen, B. G. Miller and A. W. Scaroni, *Energy Fuels*, 2002, **16**, 1463-1469.
- S9. Y. Kuwahara, D.-Y. Kang, J. R. Copeland, N. A. Brunelli, S. A. Didas, P. Bollini, C. Sievers, T. Kamegawa, H. Yamashita and C. W. Jones, *J. Am. Chem. Soc.*, 2012, **134**, 10757-10760.
- S10. Y. Lin, Q. Yan, C. Kong and L. Chen, *Sci. Rep.* 2013, **3**, 1859.

**Table S1.** Conditions for impregnating various amounts of PEI in *ca.* 0.2 g of PAF-5.

| Compound                                    | PEI (g) <sup>[a]</sup> | stirring time (h)<br>/temp (K) | sonication time (h)<br>/temp (K) | amount of impregnated<br>PEI (wt%) <sup>[b]</sup> |
|---------------------------------------------|------------------------|--------------------------------|----------------------------------|---------------------------------------------------|
| <b>PEI(10 wt%)<math>\subset</math>PAF-5</b> | 1.0                    | -                              | 1/298                            | 10.4                                              |
| <b>PEI(30 wt%)<math>\subset</math>PAF-5</b> | 2.0                    | 3/298                          | 3/323                            | 29.6                                              |
| <b>PEI(40 wt%)<math>\subset</math>PAF-5</b> | 3.0                    | 6/298                          | 6/323                            | 39.7                                              |

[a] Commercially available PEI (PEI, Mw, ~800, water content  $\leq$  2%) is dissolved in 25 ml of absolute methanol.

[b] Determined by thermogravimetric analysis data.

**Table S2.** Elemental Analysis Data of **PAF-5**, **PEI(10 wt%) $\subset$ PAF-5**, **PEI(30 wt%) $\subset$ PAF-5**, and **PEI(40 wt%) $\subset$ PAF-5**.<sup>[a]</sup>

| Compound                                    | C (%)       | N (%)       | H (%)       | N/C (%) |
|---------------------------------------------|-------------|-------------|-------------|---------|
| <b>PAF-5 (C<sub>60</sub>H<sub>36</sub>)</b> | 93.3 (95.3) | 0.24 (0.00) | 5.02 (4.76) | -       |
| <b>PEI(10 wt%)<math>\subset</math>PAF-5</b> | 89.4 (91.1) | 2.76 (3.38) | 5.58 (5.51) | 0.0309  |
| <b>PEI(30 wt%)<math>\subset</math>PAF-5</b> | 77.2 (83.5) | 9.73 (9.62) | 7.08 (6.84) | 0.126   |
| <b>PEI(40 wt%)<math>\subset</math>PAF-5</b> | 72.9 (79.6) | 11.7 (12.9) | 8.68 (7.54) | 0.160   |

<sup>[a]</sup>Calculated values are in the parentheses.

**Table S3.** Amount of adsorbed CO<sub>2</sub> by chemi- and physisorption in Figure 1.

| Compound                                    | Chemisorbed CO <sub>2</sub><br>(mmol g <sup>-1</sup> ) | Physisorbed CO <sub>2</sub><br>(mmol g <sup>-1</sup> ) | Chemisorbed CO <sub>2</sub> /<br>physisorbed CO <sub>2</sub> |
|---------------------------------------------|--------------------------------------------------------|--------------------------------------------------------|--------------------------------------------------------------|
| <b>PAF-5 (C<sub>60</sub>H<sub>36</sub>)</b> | -                                                      | 1.00                                                   | -                                                            |
| <b>PEI(10 wt%)<math>\subset</math>PAF-5</b> | 0.45                                                   | 1.04                                                   | 0.43                                                         |
| <b>PEI(30 wt%)<math>\subset</math>PAF-5</b> | 1.50                                                   | 1.01                                                   | 1.49                                                         |
| <b>PEI(40 wt%)<math>\subset</math>PAF-5</b> | 1.99                                                   | 1.16                                                   | 1.72                                                         |

**Table S4.** N<sub>2</sub> adsorption and desorption data at 77 K.

| PAF-5          |                 | PEI (10 wt%) $\subset$ PAF-5 |                 | PEI (30 wt%) $\subset$ PAF-5 |                 | PEI (40 wt%) $\subset$ PAF-5 |                 |
|----------------|-----------------|------------------------------|-----------------|------------------------------|-----------------|------------------------------|-----------------|
| <i>P</i> (atm) | <i>V</i> (cc/g) | <i>P</i> (atm)               | <i>V</i> (cc/g) | <i>P</i> (atm)               | <i>V</i> (cc/g) | <i>P</i> (atm)               | <i>V</i> (cc/g) |
| 1.07E-04       | 1.49E+02        | 9.57E-05                     | 8.66E+01        | 9.22E-05                     | 1.10E+01        | 1.07E-03                     | 2.70E+00        |
| 2.07E-04       | 1.77E+02        | 1.95E-04                     | 1.09E+02        | 1.89E-04                     | 1.41E+01        | 2.06E-03                     | 3.38E+00        |
| 2.95E-04       | 1.93E+02        | 3.02E-04                     | 1.25E+02        | 2.90E-04                     | 1.60E+01        | 3.00E-03                     | 3.76E+00        |
| 4.07E-04       | 2.08E+02        | 3.99E-04                     | 1.35E+02        | 3.93E-04                     | 1.75E+01        | 4.01E-03                     | 4.09E+00        |
| 5.01E-04       | 2.17E+02        | 5.10E-04                     | 1.45E+02        | 4.91E-04                     | 1.87E+01        | 5.03E-03                     | 4.49E+00        |
| 6.11E-04       | 2.27E+02        | 5.99E-04                     | 1.52E+02        | 5.91E-04                     | 1.97E+01        | 6.05E-03                     | 4.71E+00        |
| 7.20E-04       | 2.35E+02        | 7.06E-04                     | 1.59E+02        | 7.01E-04                     | 2.07E+01        | 7.13E-03                     | 4.91E+00        |
| 7.98E-04       | 2.40E+02        | 8.16E-04                     | 1.65E+02        | 8.03E-04                     | 2.14E+01        | 8.02E-03                     | 5.06E+00        |
| 9.36E-04       | 2.48E+02        | 9.25E-04                     | 1.70E+02        | 8.99E-04                     | 2.21E+01        | 9.01E-03                     | 5.22E+00        |
| 1.02E-03       | 2.52E+02        | 1.00E-03                     | 1.74E+02        | 9.97E-04                     | 2.28E+01        | 1.01E-02                     | 5.38E+00        |
| 2.01E-03       | 2.85E+02        | 2.02E-03                     | 2.05E+02        | 2.01E-03                     | 2.73E+01        | 2.05E-02                     | 6.40E+00        |
| 3.00E-03       | 3.06E+02        | 3.06E-03                     | 2.25E+02        | 3.03E-03                     | 3.01E+01        | 3.12E-02                     | 7.11E+00        |
| 4.05E-03       | 3.21E+02        | 4.00E-03                     | 2.37E+02        | 4.04E-03                     | 3.22E+01        | 4.16E-02                     | 7.64E+00        |
| 5.05E-03       | 3.32E+02        | 5.06E-03                     | 2.49E+02        | 5.04E-03                     | 3.38E+01        | 5.18E-02                     | 8.09E+00        |
| 6.85E-03       | 3.48E+02        | 6.95E-03                     | 2.65E+02        | 6.06E-03                     | 3.52E+01        | 6.20E-02                     | 8.47E+00        |
| 7.81E-03       | 3.56E+02        | 7.68E-03                     | 2.70E+02        | 7.08E-03                     | 3.63E+01        | 7.21E-02                     | 8.80E+00        |
| 8.34E-03       | 3.59E+02        | 8.37E-03                     | 2.74E+02        | 8.04E-03                     | 3.73E+01        | 8.22E-02                     | 9.11E+00        |
| 9.22E-03       | 3.65E+02        | 9.21E-03                     | 2.79E+02        | 9.13E-03                     | 3.83E+01        | 9.23E-02                     | 9.39E+00        |
| 9.70E-03       | 3.66E+02        | 9.91E-03                     | 2.84E+02        | 1.01E-02                     | 3.91E+01        | 1.11E-01                     | 9.84E+00        |
| 1.54E-02       | 3.90E+02        | 1.52E-02                     | 3.06E+02        | 2.22E-02                     | 4.55E+01        | 1.60E-01                     | 1.08E+01        |
| 2.66E-02       | 4.23E+02        | 2.97E-02                     | 3.43E+02        | 2.97E-02                     | 4.81E+01        | 2.10E-01                     | 1.17E+01        |
| 3.29E-02       | 4.36E+02        | 3.94E-02                     | 3.59E+02        | 3.95E-02                     | 5.09E+01        | 2.60E-01                     | 1.26E+01        |
| 4.30E-02       | 4.53E+02        | 4.65E-02                     | 3.68E+02        | 5.02E-02                     | 5.33E+01        | 3.08E-01                     | 1.38E+01        |
| 5.46E-02       | 4.69E+02        | 5.42E-02                     | 3.77E+02        | 6.08E-02                     | 5.52E+01        | 3.60E-01                     | 1.48E+01        |
| 6.21E-02       | 4.77E+02        | 6.57E-02                     | 3.87E+02        | 7.13E-02                     | 5.68E+01        | 4.09E-01                     | 1.58E+01        |
| 7.43E-02       | 4.89E+02        | 7.56E-02                     | 3.94E+02        | 7.95E-02                     | 5.79E+01        | 4.59E-01                     | 1.68E+01        |
| 8.24E-02       | 4.96E+02        | 8.37E-02                     | 3.99E+02        | 9.16E-02                     | 5.93E+01        | 5.09E-01                     | 1.79E+01        |
| 1.00E-01       | 5.12E+02        | 9.82E-02                     | 4.06E+02        | 1.07E-01                     | 6.09E+01        | 5.59E-01                     | 1.90E+01        |
| 1.19E-01       | 5.28E+02        | 1.22E-01                     | 4.17E+02        | 1.51E-01                     | 6.42E+01        | 6.09E-01                     | 2.02E+01        |
| 1.47E-01       | 5.50E+02        | 1.96E-01                     | 4.42E+02        | 2.03E-01                     | 6.71E+01        | 6.59E-01                     | 2.15E+01        |
| 2.51E-01       | 6.29E+02        | 2.53E-01                     | 4.56E+02        | 2.55E-01                     | 6.95E+01        | 7.08E-01                     | 2.30E+01        |
| 3.02E-01       | 6.69E+02        | 2.98E-01                     | 4.67E+02        | 3.05E-01                     | 7.16E+01        | 7.58E-01                     | 2.46E+01        |
| 3.50E-01       | 7.14E+02        | 3.46E-01                     | 4.77E+02        | 3.54E-01                     | 7.40E+01        | 8.06E-01                     | 2.65E+01        |
| 4.01E-01       | 7.53E+02        | 4.03E-01                     | 4.90E+02        | 4.06E-01                     | 7.60E+01        | 8.55E-01                     | 2.89E+01        |
| 4.48E-01       | 7.95E+02        | 4.53E-01                     | 4.99E+02        | 4.56E-01                     | 7.81E+01        | 9.01E-01                     | 3.22E+01        |
| 4.99E-01       | 8.30E+02        | 5.04E-01                     | 5.12E+02        | 5.06E-01                     | 8.02E+01        | 8.41E-01                     | 2.86E+01        |
| 5.49E-01       | 8.65E+02        | 5.48E-01                     | 5.22E+02        | 5.55E-01                     | 8.23E+01        | 7.93E-01                     | 2.70E+01        |
| 6.00E-01       | 8.96E+02        | 6.02E-01                     | 5.35E+02        | 6.05E-01                     | 8.46E+01        | 7.43E-01                     | 2.52E+01        |
| 6.49E-01       | 9.23E+02        | 6.51E-01                     | 5.49E+02        | 6.54E-01                     | 8.70E+01        | 6.92E-01                     | 2.36E+01        |
| 7.00E-01       | 9.50E+02        | 7.05E-01                     | 5.61E+02        | 7.04E-01                     | 8.95E+01        | 6.42E-01                     | 2.22E+01        |
| 7.50E-01       | 9.75E+02        | 7.53E-01                     | 5.78E+02        | 7.52E-01                     | 9.24E+01        | 5.91E-01                     | 2.09E+01        |

|          |          |          |          |          |          |          |          |
|----------|----------|----------|----------|----------|----------|----------|----------|
| 8.03E-01 | 1.00E+03 | 8.01E-01 | 5.91E+02 | 8.00E-01 | 9.57E+01 | 5.41E-01 | 1.97E+01 |
| 8.49E-01 | 1.02E+03 | 8.53E-01 | 6.11E+02 | 8.57E-01 | 1.01E+02 | 4.90E-01 | 1.86E+01 |
| 9.00E-01 | 1.05E+03 | 8.97E-01 | 6.26E+02 | 9.04E-01 | 1.08E+02 | 4.40E-01 | 1.75E+01 |
| 8.92E-01 | 1.05E+03 | 8.90E-01 | 6.25E+02 | 8.50E-01 | 1.01E+02 | 3.90E-01 | 1.65E+01 |
| 8.48E-01 | 1.04E+03 | 8.49E-01 | 6.19E+02 | 7.94E-01 | 9.69E+01 | 3.40E-01 | 1.55E+01 |
| 7.99E-01 | 1.03E+03 | 7.99E-01 | 6.12E+02 | 7.48E-01 | 9.40E+01 | 2.90E-01 | 1.46E+01 |
| 7.49E-01 | 1.02E+03 | 7.48E-01 | 6.06E+02 | 6.99E-01 | 9.14E+01 | 2.40E-01 | 1.37E+01 |
| 6.98E-01 | 1.01E+03 | 7.03E-01 | 6.02E+02 | 6.49E-01 | 8.91E+01 | 1.90E-01 | 1.27E+01 |
| 6.49E-01 | 1.00E+03 | 6.47E-01 | 5.96E+02 | 5.98E-01 | 8.68E+01 | 1.40E-01 | 1.17E+01 |
| 5.99E-01 | 9.91E+02 | 5.92E-01 | 5.90E+02 | 5.45E-01 | 8.50E+01 | 9.06E-02 | 1.05E+01 |
| 5.51E-01 | 9.82E+02 | 5.53E-01 | 5.86E+02 | 4.94E-01 | 8.30E+01 | 4.26E-02 | 8.65E+00 |
| 5.02E-01 | 9.71E+02 | 4.98E-01 | 5.80E+02 | 4.44E-01 | 8.10E+01 | 6.51E-03 | 5.47E+00 |
| 4.46E-01 | 9.56E+02 | 4.49E-01 | 5.74E+02 | 3.94E-01 | 7.91E+01 | 4.05E-03 | 4.89E+00 |
| 4.04E-01 | 9.45E+02 | 3.96E-01 | 5.67E+02 | 3.44E-01 | 7.71E+01 |          |          |
| 3.51E-01 | 9.28E+02 | 3.50E-01 | 5.61E+02 | 2.94E-01 | 7.52E+01 |          |          |
| 3.02E-01 | 9.11E+02 | 3.03E-01 | 5.53E+02 | 2.44E-01 | 7.31E+01 |          |          |
| 2.51E-01 | 8.86E+02 | 2.47E-01 | 5.42E+02 | 1.95E-01 | 7.08E+01 |          |          |
| 1.99E-01 | 8.56E+02 | 1.99E-01 | 5.30E+02 | 1.47E-01 | 6.80E+01 |          |          |
| 1.78E-01 | 8.41E+02 | 1.72E-01 | 5.21E+02 | 1.00E-01 | 6.44E+01 |          |          |

---



**Table S5.** N<sub>2</sub> adsorption and desorption data at 298 K.

| PAF-5          |                 | PEI (10 wt%) $\subset$ PAF-5 |                 | PEI (30 wt%) $\subset$ PAF-5 |                 | PEI (40 wt%) $\subset$ PAF-5 |                 |
|----------------|-----------------|------------------------------|-----------------|------------------------------|-----------------|------------------------------|-----------------|
| <i>P</i> (atm) | <i>V</i> (cc/g) | <i>P</i> (atm)               | <i>V</i> (cc/g) | <i>P</i> (atm)               | <i>V</i> (cc/g) | <i>P</i> (atm)               | <i>V</i> (cc/g) |
| 1.26E-02       | 2.21E-02        | 4.32E-03                     | 6.00E-04        | 1.62E-01                     | 6.80E-03        | 4.12E-01                     | 6.00E-03        |
| 2.26E-02       | 9.92E-02        | 5.02E-03                     | 9.00E-04        | 2.12E-01                     | 1.59E-02        | 4.62E-01                     | 2.68E-02        |
| 3.24E-02       | 1.72E-01        | 6.04E-03                     | 2.10E-03        | 2.62E-01                     | 4.54E-02        | 5.12E-01                     | 6.07E-02        |
| 4.22E-02       | 2.53E-01        | 7.01E-03                     | 2.90E-03        | 3.12E-01                     | 8.20E-02        | 5.62E-01                     | 7.38E-02        |
| 5.20E-02       | 3.62E-01        | 9.24E-03                     | 8.40E-03        | 3.62E-01                     | 1.23E-01        | 6.12E-01                     | 1.11E-01        |
| 6.21E-02       | 4.33E-01        | 9.85E-03                     | 8.20E-03        | 4.12E-01                     | 1.50E-01        | 6.62E-01                     | 1.32E-01        |
| 7.23E-02       | 4.18E-01        | 1.27E-02                     | 2.57E-02        | 4.62E-01                     | 2.02E-01        | 7.12E-01                     | 1.66E-01        |
| 8.26E-02       | 3.91E-01        | 2.25E-02                     | 7.77E-02        | 5.12E-01                     | 2.50E-01        | 7.62E-01                     | 2.02E-01        |
| 9.30E-02       | 3.49E-01        | 3.23E-02                     | 1.34E-01        | 5.62E-01                     | 2.82E-01        | 8.12E-01                     | 2.28E-01        |
| 1.12E-01       | 4.32E-01        | 4.23E-02                     | 2.02E-01        | 6.12E-01                     | 3.32E-01        | 8.62E-01                     | 2.83E-01        |
| 1.62E-01       | 6.31E-01        | 5.20E-02                     | 2.64E-01        | 6.62E-01                     | 3.99E-01        | 9.12E-01                     | 3.24E-01        |
| 2.12E-01       | 8.28E-01        | 6.24E-02                     | 2.59E-01        | 7.12E-01                     | 4.53E-01        | 9.62E-01                     | 3.64E-01        |
| 2.62E-01       | 9.91E-01        | 7.26E-02                     | 2.45E-01        | 7.62E-01                     | 4.88E-01        | 9.99E-01                     | 4.09E-01        |
| 3.11E-01       | 1.28E+00        | 8.28E-02                     | 2.44E-01        | 8.12E-01                     | 5.40E-01        | 9.42E-01                     | 4.18E-01        |
| 3.61E-01       | 1.52E+00        | 9.30E-02                     | 2.48E-01        | 8.62E-01                     | 6.29E-01        | 8.88E-01                     | 4.19E-01        |
| 4.12E-01       | 1.60E+00        | 1.12E-01                     | 2.87E-01        | 9.12E-01                     | 6.92E-01        | 8.38E-01                     | 4.12E-01        |
| 4.62E-01       | 1.87E+00        | 1.61E-01                     | 4.65E-01        | 9.62E-01                     | 7.31E-01        | 7.88E-01                     | 4.11E-01        |
| 5.11E-01       | 2.14E+00        | 2.12E-01                     | 5.75E-01        | 9.99E-01                     | 7.88E-01        | 7.38E-01                     | 4.14E-01        |
| 5.61E-01       | 2.35E+00        | 2.62E-01                     | 7.00E-01        | 9.43E-01                     | 7.66E-01        | 6.88E-01                     | 4.12E-01        |
| 6.12E-01       | 2.58E+00        | 3.12E-01                     | 8.92E-01        | 8.88E-01                     | 7.42E-01        | 6.38E-01                     | 4.07E-01        |
| 6.61E-01       | 2.77E+00        | 3.61E-01                     | 1.08E+00        | 8.38E-01                     | 7.02E-01        | 5.88E-01                     | 4.03E-01        |
| 7.11E-01       | 2.91E+00        | 4.12E-01                     | 1.16E+00        | 7.88E-01                     | 6.88E-01        | 5.38E-01                     | 3.81E-01        |
| 7.61E-01       | 3.15E+00        | 4.62E-01                     | 1.30E+00        | 7.38E-01                     | 6.69E-01        | 4.88E-01                     | 3.68E-01        |
| 8.11E-01       | 3.42E+00        | 5.11E-01                     | 1.51E+00        | 6.88E-01                     | 6.38E-01        | 4.38E-01                     | 3.50E-01        |
| 8.61E-01       | 3.59E+00        | 5.61E-01                     | 1.65E+00        | 6.38E-01                     | 6.13E-01        | 3.88E-01                     | 3.42E-01        |
| 9.12E-01       | 3.70E+00        | 6.12E-01                     | 1.77E+00        | 5.88E-01                     | 5.88E-01        | 3.38E-01                     | 3.29E-01        |
| 9.61E-01       | 3.90E+00        | 6.61E-01                     | 1.96E+00        | 5.38E-01                     | 5.40E-01        | 2.88E-01                     | 3.10E-01        |
| 9.99E-01       | 4.18E+00        | 7.11E-01                     | 2.12E+00        | 4.88E-01                     | 5.13E-01        | 2.38E-01                     | 3.14E-01        |
| 9.39E-01       | 3.81E+00        | 7.62E-01                     | 2.29E+00        | 4.38E-01                     | 5.16E-01        | 1.88E-01                     | 3.14E-01        |
| 8.88E-01       | 3.75E+00        | 8.11E-01                     | 2.42E+00        | 3.88E-01                     | 4.48E-01        | 1.38E-01                     | 3.30E-01        |
| 8.38E-01       | 3.59E+00        | 8.61E-01                     | 2.51E+00        | 3.38E-01                     | 4.18E-01        | 8.80E-02                     | 3.46E-01        |
| 7.88E-01       | 3.38E+00        | 9.12E-01                     | 2.64E+00        | 2.88E-01                     | 3.84E-01        | 3.11E-02                     | 4.42E-01        |
| 7.38E-01       | 3.16E+00        | 9.62E-01                     | 2.73E+00        | 2.38E-01                     | 3.72E-01        | 3.97E-03                     | 3.87E-01        |
| 6.88E-01       | 2.99E+00        | 9.99E-01                     | 2.86E+00        | 1.88E-01                     | 3.48E-01        |                              |                 |
| 6.38E-01       | 2.71E+00        | 9.39E-01                     | 2.69E+00        | 1.38E-01                     | 3.29E-01        |                              |                 |
| 5.88E-01       | 2.47E+00        | 8.88E-01                     | 2.65E+00        | 8.81E-02                     | 3.06E-01        |                              |                 |
| 5.38E-01       | 2.26E+00        | 8.38E-01                     | 2.50E+00        | 3.15E-02                     | 2.33E-01        |                              |                 |
| 4.88E-01       | 2.02E+00        | 7.88E-01                     | 2.37E+00        |                              |                 |                              |                 |
| 4.39E-01       | 1.75E+00        | 7.39E-01                     | 2.21E+00        |                              |                 |                              |                 |
| 3.88E-01       | 1.57E+00        | 6.88E-01                     | 2.06E+00        |                              |                 |                              |                 |
| 3.38E-01       | 1.41E+00        | 6.39E-01                     | 1.98E+00        |                              |                 |                              |                 |

|          |          |          |          |
|----------|----------|----------|----------|
| 2.89E-01 | 1.15E+00 | 5.88E-01 | 1.81E+00 |
| 2.39E-01 | 9.15E-01 | 5.38E-01 | 1.67E+00 |
| 1.89E-01 | 7.37E-01 | 4.89E-01 | 1.54E+00 |
| 1.38E-01 | 6.29E-01 | 4.40E-01 | 1.30E+00 |
|          |          | 3.88E-01 | 1.26E+00 |
|          |          | 3.39E-01 | 1.14E+00 |
|          |          | 2.89E-01 | 9.61E-01 |
|          |          | 2.39E-01 | 7.57E-01 |
|          |          | 1.89E-01 | 6.33E-01 |
|          |          | 1.38E-01 | 5.29E-01 |

---

**Table S6.** N<sub>2</sub> adsorption and desorption data at 313 K.

| PAF-5          |                 | PEI (10 wt%) $\subset$ PAF-5 |                 | PEI (30 wt%) $\subset$ PAF-5 |                 | PEI (40 wt%) $\subset$ PAF-5 |                 |
|----------------|-----------------|------------------------------|-----------------|------------------------------|-----------------|------------------------------|-----------------|
| <i>P</i> (atm) | <i>V</i> (cc/g) | <i>P</i> (atm)               | <i>V</i> (cc/g) | <i>P</i> (atm)               | <i>V</i> (cc/g) | <i>P</i> (atm)               | <i>V</i> (cc/g) |
| 1.27E-02       | 1.14E-02        | 1.31E-02                     | 2.30E-03        | 2.62E-01                     | 1.31E-02        | 6.62E-01                     | 4.00E-03        |
| 2.28E-02       | 4.04E-02        | 2.26E-02                     | 3.58E-02        | 3.12E-01                     | 4.07E-02        | 7.12E-01                     | 4.53E-02        |
| 3.26E-02       | 9.02E-02        | 3.22E-02                     | 7.34E-02        | 3.62E-01                     | 7.47E-02        | 7.62E-01                     | 7.34E-02        |
| 4.24E-02       | 1.74E-01        | 4.21E-02                     | 1.11E-01        | 4.12E-01                     | 1.02E-01        | 8.12E-01                     | 1.07E-01        |
| 5.22E-02       | 2.53E-01        | 5.18E-02                     | 1.72E-01        | 4.62E-01                     | 1.44E-01        | 8.62E-01                     | 1.48E-01        |
| 6.22E-02       | 3.05E-01        | 6.21E-02                     | 1.92E-01        | 5.12E-01                     | 1.83E-01        | 9.12E-01                     | 1.90E-01        |
| 7.22E-02       | 3.30E-01        | 7.23E-02                     | 1.78E-01        | 5.62E-01                     | 2.23E-01        | 9.62E-01                     | 2.26E-01        |
| 8.24E-02       | 3.44E-01        | 8.26E-02                     | 1.51E-01        | 6.12E-01                     | 2.65E-01        | 9.99E-01                     | 2.63E-01        |
| 9.29E-02       | 2.97E-01        | 9.29E-02                     | 1.07E-01        | 6.62E-01                     | 3.10E-01        | 9.42E-01                     | 2.75E-01        |
| 1.12E-01       | 2.63E-01        | 1.12E-01                     | 9.59E-02        | 7.12E-01                     | 3.36E-01        | 8.88E-01                     | 2.42E-01        |
| 1.62E-01       | 3.05E-01        | 1.62E-01                     | 1.15E-01        | 7.62E-01                     | 3.84E-01        | 8.38E-01                     | 2.48E-01        |
| 2.12E-01       | 4.86E-01        | 2.12E-01                     | 2.22E-01        | 8.12E-01                     | 4.43E-01        | 7.88E-01                     | 2.62E-01        |
| 2.62E-01       | 5.55E-01        | 2.62E-01                     | 2.76E-01        | 8.62E-01                     | 4.95E-01        | 7.38E-01                     | 2.64E-01        |
| 3.11E-01       | 7.23E-01        | 3.12E-01                     | 3.87E-01        | 9.12E-01                     | 5.28E-01        | 6.88E-01                     | 2.42E-01        |
| 3.61E-01       | 9.21E-01        | 3.62E-01                     | 4.81E-01        | 9.62E-01                     | 5.85E-01        | 6.38E-01                     | 2.38E-01        |
| 4.12E-01       | 9.12E-01        | 4.12E-01                     | 4.74E-01        | 9.99E-01                     | 6.24E-01        | 5.88E-01                     | 2.29E-01        |
| 4.62E-01       | 9.80E-01        | 4.62E-01                     | 5.51E-01        | 9.43E-01                     | 5.91E-01        | 5.38E-01                     | 2.14E-01        |
| 5.12E-01       | 1.26E+00        | 5.11E-01                     | 6.65E-01        | 8.88E-01                     | 5.77E-01        | 4.88E-01                     | 1.84E-01        |
| 5.62E-01       | 1.29E+00        | 5.62E-01                     | 7.34E-01        | 8.38E-01                     | 5.73E-01        | 4.38E-01                     | 1.78E-01        |
| 6.11E-01       | 1.43E+00        | 6.12E-01                     | 7.96E-01        | 7.88E-01                     | 6.16E-01        | 3.88E-01                     | 1.68E-01        |
| 6.62E-01       | 1.51E+00        | 6.62E-01                     | 8.67E-01        | 7.38E-01                     | 5.87E-01        | 3.38E-01                     | 1.57E-01        |
| 7.11E-01       | 1.71E+00        | 7.12E-01                     | 9.34E-01        | 6.88E-01                     | 5.59E-01        | 2.88E-01                     | 1.37E-01        |
| 7.62E-01       | 1.79E+00        | 7.62E-01                     | 9.67E-01        | 6.38E-01                     | 5.29E-01        | 2.38E-01                     | 1.45E-01        |
| 8.11E-01       | 1.92E+00        | 8.12E-01                     | 1.04E+00        | 5.88E-01                     | 5.14E-01        | 1.88E-01                     | 1.35E-01        |
| 8.61E-01       | 2.27E+00        | 8.61E-01                     | 1.12E+00        | 5.38E-01                     | 4.88E-01        | 1.38E-01                     | 1.64E-01        |
| 9.12E-01       | 2.24E+00        | 9.12E-01                     | 1.10E+00        | 4.88E-01                     | 4.54E-01        | 8.80E-02                     | 1.78E-01        |
| 9.62E-01       | 2.31E+00        | 9.62E-01                     | 1.11E+00        | 4.38E-01                     | 4.29E-01        | 3.12E-02                     | 1.70E-01        |
| 9.99E-01       | 2.56E+00        | 9.99E-01                     | 1.25E+00        | 3.88E-01                     | 4.06E-01        | 3.94E-03                     | 1.62E-01        |
| 9.38E-01       | 2.30E+00        | 9.39E-01                     | 1.12E+00        | 3.38E-01                     | 3.86E-01        |                              |                 |
| 8.87E-01       | 2.28E+00        | 8.88E-01                     | 1.15E+00        | 2.88E-01                     | 3.56E-01        |                              |                 |
| 8.38E-01       | 2.12E+00        | 8.38E-01                     | 1.13E+00        | 2.38E-01                     | 3.42E-01        |                              |                 |
| 7.88E-01       | 2.09E+00        | 7.88E-01                     | 1.02E+00        | 1.88E-01                     | 3.20E-01        |                              |                 |
| 7.38E-01       | 1.96E+00        | 7.39E-01                     | 9.52E-01        | 1.38E-01                     | 3.12E-01        |                              |                 |
| 6.88E-01       | 1.85E+00        | 6.88E-01                     | 9.38E-01        | 8.80E-02                     | 2.97E-01        |                              |                 |
| 6.38E-01       | 1.69E+00        | 6.38E-01                     | 8.98E-01        | 3.13E-02                     | 2.47E-01        |                              |                 |
| 5.88E-01       | 1.59E+00        | 5.88E-01                     | 8.29E-01        |                              |                 |                              |                 |
| 5.38E-01       | 1.48E+00        | 5.38E-01                     | 7.34E-01        |                              |                 |                              |                 |
| 4.88E-01       | 1.30E+00        | 4.88E-01                     | 7.01E-01        |                              |                 |                              |                 |
| 4.39E-01       | 1.04E+00        | 4.39E-01                     | 5.16E-01        |                              |                 |                              |                 |
| 3.88E-01       | 1.14E+00        | 3.88E-01                     | 5.52E-01        |                              |                 |                              |                 |
| 3.38E-01       | 1.02E+00        | 3.38E-01                     | 4.86E-01        |                              |                 |                              |                 |
| 2.88E-01       | 8.35E-01        | 2.89E-01                     | 3.98E-01        |                              |                 |                              |                 |

|          |          |          |          |
|----------|----------|----------|----------|
| 2.39E-01 | 5.76E-01 | 2.39E-01 | 2.77E-01 |
| 1.89E-01 | 4.88E-01 | 1.88E-01 | 2.14E-01 |
| 1.38E-01 | 4.30E-01 | 1.38E-01 | 1.91E-01 |

---

**Table S7.** N<sub>2</sub> adsorption and desorption data at 323 K.

| PAF-5          |                 | PEI (10 wt%) $\subset$ PAF-5 |                 | PEI (30 wt%) $\subset$ PAF-5 |                 | PEI (40 wt%) $\subset$ PAF-5 |                 |
|----------------|-----------------|------------------------------|-----------------|------------------------------|-----------------|------------------------------|-----------------|
| <i>P</i> (atm) | <i>V</i> (cc/g) | <i>P</i> (atm)               | <i>V</i> (cc/g) | <i>P</i> (atm)               | <i>V</i> (cc/g) | <i>P</i> (atm)               | <i>V</i> (cc/g) |
| 1.12E-01       | 7.50E-03        | 4.29E-02                     | 2.40E-03        | 5.29E-02                     | 1.40E-02        | 6.12E-01                     | 6.20E-03        |
| 1.62E-01       | 6.78E-02        | 5.30E-02                     | 1.80E-02        | 6.29E-02                     | 1.60E-02        | 6.62E-01                     | 3.11E-02        |
| 2.12E-01       | 1.29E-01        | 6.30E-02                     | 2.81E-02        | 7.29E-02                     | 1.08E-02        | 7.12E-01                     | 5.61E-02        |
| 2.62E-01       | 2.18E-01        | 7.30E-02                     | 3.83E-02        | 8.30E-02                     | 8.70E-03        | 7.62E-01                     | 8.28E-02        |
| 3.12E-01       | 2.88E-01        | 8.30E-02                     | 4.80E-02        | 9.30E-02                     | 1.04E-02        | 8.12E-01                     | 1.15E-01        |
| 3.62E-01       | 3.83E-01        | 9.29E-02                     | 6.62E-02        | 1.12E-01                     | 7.60E-03        | 8.62E-01                     | 1.79E-01        |
| 4.12E-01       | 4.45E-01        | 1.12E-01                     | 9.16E-02        | 1.62E-01                     | 3.40E-03        | 9.12E-01                     | 1.86E-01        |
| 4.62E-01       | 5.47E-01        | 1.62E-01                     | 1.58E-01        | 2.62E-01                     | 7.20E-03        | 9.62E-01                     | 2.26E-01        |
| 5.12E-01       | 6.63E-01        | 2.12E-01                     | 2.13E-01        | 3.12E-01                     | 2.21E-02        | 9.99E-01                     | 2.38E-01        |
| 5.62E-01       | 7.24E-01        | 2.62E-01                     | 3.04E-01        | 3.62E-01                     | 4.26E-02        | 9.42E-01                     | 2.12E-01        |
| 6.12E-01       | 8.35E-01        | 3.12E-01                     | 3.61E-01        | 4.12E-01                     | 3.28E-02        | 8.88E-01                     | 2.28E-01        |
| 6.62E-01       | 9.54E-01        | 3.62E-01                     | 4.57E-01        | 4.62E-01                     | 6.72E-02        | 8.38E-01                     | 2.30E-01        |
| 7.12E-01       | 1.03E+00        | 4.12E-01                     | 5.22E-01        | 5.12E-01                     | 9.27E-02        | 7.88E-01                     | 2.26E-01        |
| 7.62E-01       | 1.14E+00        | 4.62E-01                     | 6.26E-01        | 5.62E-01                     | 1.09E-01        | 7.38E-01                     | 1.87E-01        |
| 8.12E-01       | 1.25E+00        | 5.12E-01                     | 7.17E-01        | 6.12E-01                     | 1.34E-01        | 6.88E-01                     | 2.04E-01        |
| 8.62E-01       | 1.38E+00        | 5.62E-01                     | 8.04E-01        | 6.62E-01                     | 1.58E-01        | 6.38E-01                     | 1.96E-01        |
| 9.11E-01       | 1.55E+00        | 6.12E-01                     | 9.03E-01        | 7.12E-01                     | 1.87E-01        | 5.88E-01                     | 2.03E-01        |
| 9.62E-01       | 1.63E+00        | 6.62E-01                     | 9.86E-01        | 7.62E-01                     | 2.16E-01        | 5.38E-01                     | 1.74E-01        |
| 9.99E-01       | 1.71E+00        | 7.12E-01                     | 1.13E+00        | 8.12E-01                     | 2.84E-01        | 4.88E-01                     | 1.64E-01        |
| 9.42E-01       | 1.69E+00        | 7.62E-01                     | 1.20E+00        | 8.62E-01                     | 3.27E-01        | 4.38E-01                     | 1.56E-01        |
| 8.88E-01       | 1.60E+00        | 8.12E-01                     | 1.29E+00        | 9.12E-01                     | 4.04E-01        | 3.88E-01                     | 1.39E-01        |
| 8.38E-01       | 1.50E+00        | 8.62E-01                     | 1.45E+00        | 9.62E-01                     | 4.24E-01        | 3.38E-01                     | 1.43E-01        |
| 7.88E-01       | 1.41E+00        | 9.12E-01                     | 1.54E+00        | 9.99E-01                     | 4.68E-01        | 2.88E-01                     | 1.24E-01        |
| 7.38E-01       | 1.34E+00        | 9.62E-01                     | 1.64E+00        | 9.42E-01                     | 4.72E-01        | 2.38E-01                     | 1.36E-01        |
| 6.88E-01       | 1.23E+00        | 9.99E-01                     | 1.72E+00        | 8.88E-01                     | 4.94E-01        | 1.88E-01                     | 1.39E-01        |
| 6.38E-01       | 1.12E+00        | 9.42E-01                     | 1.66E+00        | 8.38E-01                     | 4.77E-01        | 1.38E-01                     | 1.65E-01        |
| 5.88E-01       | 1.03E+00        | 8.88E-01                     | 1.58E+00        | 7.88E-01                     | 4.84E-01        | 8.80E-02                     | 1.79E-01        |
| 5.38E-01       | 9.98E-01        | 8.38E-01                     | 1.48E+00        | 7.38E-01                     | 4.96E-01        | 3.12E-02                     | 1.41E-01        |
| 4.88E-01       | 8.59E-01        | 7.88E-01                     | 1.41E+00        | 6.88E-01                     | 4.79E-01        |                              |                 |
| 4.38E-01       | 7.57E-01        | 7.38E-01                     | 1.32E+00        | 6.38E-01                     | 4.69E-01        |                              |                 |
| 3.88E-01       | 6.61E-01        | 6.88E-01                     | 1.25E+00        | 5.88E-01                     | 4.74E-01        |                              |                 |
| 3.38E-01       | 5.52E-01        | 6.38E-01                     | 1.14E+00        | 5.38E-01                     | 4.53E-01        |                              |                 |
| 2.88E-01       | 4.48E-01        | 5.88E-01                     | 1.08E+00        | 4.88E-01                     | 4.29E-01        |                              |                 |
| 2.38E-01       | 4.02E-01        | 5.38E-01                     | 9.69E-01        | 4.38E-01                     | 4.26E-01        |                              |                 |
| 1.88E-01       | 3.10E-01        | 4.88E-01                     | 8.62E-01        | 3.88E-01                     | 4.12E-01        |                              |                 |
| 1.38E-01       | 2.50E-01        | 4.38E-01                     | 7.75E-01        | 3.38E-01                     | 3.85E-01        |                              |                 |
| 8.82E-02       | 1.75E-01        | 3.88E-01                     | 7.00E-01        | 2.88E-01                     | 3.88E-01        |                              |                 |
| 3.14E-02       | 5.79E-02        | 3.38E-01                     | 6.07E-01        | 2.38E-01                     | 3.92E-01        |                              |                 |
|                |                 | 2.88E-01                     | 5.07E-01        | 1.88E-01                     | 3.93E-01        |                              |                 |
|                |                 | 2.38E-01                     | 4.37E-01        | 1.38E-01                     | 4.07E-01        |                              |                 |
|                |                 | 1.88E-01                     | 3.54E-01        | 8.80E-02                     | 4.12E-01        |                              |                 |
|                |                 | 1.38E-01                     | 3.05E-01        | 3.09E-02                     | 4.31E-01        |                              |                 |

|          |          |          |          |
|----------|----------|----------|----------|
| 8.81E-02 | 2.56E-01 | 3.78E-03 | 4.22E-01 |
| 3.14E-02 | 1.39E-01 |          |          |

---

**Table S8.** CO<sub>2</sub> adsorption and desorption data at 298 K.

| PAF-5          |                 | PEI (10 wt%) $\subset$ PAF-5 |                 | PEI (30 wt%) $\subset$ PAF-5 |                 | PEI (40 wt%) $\subset$ PAF-5 |                 |
|----------------|-----------------|------------------------------|-----------------|------------------------------|-----------------|------------------------------|-----------------|
| <i>P</i> (atm) | <i>V</i> (cc/g) | <i>P</i> (atm)               | <i>V</i> (cc/g) | <i>P</i> (atm)               | <i>V</i> (cc/g) | <i>P</i> (atm)               | <i>V</i> (cc/g) |
| 1.00E-03       | 1.63E-02        | 1.00E-03                     | 4.25E+00        | 1.00E-04                     | 8.74E+00        | 9.98E-05                     | 2.41E+01        |
| 2.01E-03       | 4.70E-02        | 2.00E-03                     | 5.31E+00        | 1.99E-04                     | 1.72E+01        | 1.99E-04                     | 2.87E+01        |
| 3.00E-03       | 7.84E-02        | 3.05E-03                     | 5.93E+00        | 2.99E-04                     | 1.90E+01        | 2.99E-04                     | 3.11E+01        |
| 4.02E-03       | 1.13E-01        | 4.08E-03                     | 6.40E+00        | 4.01E-04                     | 2.01E+01        | 3.99E-04                     | 3.26E+01        |
| 5.00E-03       | 1.42E-01        | 5.11E-03                     | 6.76E+00        | 5.08E-04                     | 2.08E+01        | 4.99E-04                     | 3.39E+01        |
| 6.35E-03       | 1.89E-01        | 6.05E-03                     | 7.03E+00        | 6.01E-04                     | 2.13E+01        | 5.99E-04                     | 3.47E+01        |
| 7.03E-03       | 2.08E-01        | 7.13E-03                     | 7.30E+00        | 7.00E-04                     | 2.19E+01        | 7.01E-04                     | 3.55E+01        |
| 9.12E-03       | 2.86E-01        | 8.25E-03                     | 7.56E+00        | 8.06E-04                     | 2.28E+01        | 8.00E-04                     | 3.62E+01        |
| 1.04E-02       | 6.26E-01        | 9.09E-03                     | 7.73E+00        | 9.02E-04                     | 2.33E+01        | 9.00E-04                     | 3.68E+01        |
| 1.25E-02       | 6.77E-01        | 1.01E-02                     | 7.91E+00        | 1.01E-03                     | 2.39E+01        | 1.00E-03                     | 3.72E+01        |
| 2.19E-02       | 1.07E+00        | 2.01E-02                     | 8.95E+00        | 2.01E-03                     | 2.67E+01        | 2.02E-03                     | 4.00E+01        |
| 3.15E-02       | 1.60E+00        | 3.06E-02                     | 9.82E+00        | 3.00E-03                     | 2.82E+01        | 3.01E-03                     | 4.19E+01        |
| 4.15E-02       | 2.07E+00        | 4.09E-02                     | 1.06E+01        | 4.04E-03                     | 2.93E+01        | 4.03E-03                     | 4.31E+01        |
| 5.12E-02       | 2.54E+00        | 5.11E-02                     | 1.12E+01        | 5.12E-03                     | 3.04E+01        | 5.02E-03                     | 4.42E+01        |
| 6.13E-02       | 2.91E+00        | 6.13E-02                     | 1.18E+01        | 6.01E-03                     | 3.10E+01        | 6.05E-03                     | 4.51E+01        |
| 7.17E-02       | 3.21E+00        | 7.14E-02                     | 1.25E+01        | 7.06E-03                     | 3.16E+01        | 7.08E-03                     | 4.58E+01        |
| 8.19E-02       | 3.61E+00        | 8.15E-02                     | 1.30E+01        | 8.06E-03                     | 3.21E+01        | 8.13E-03                     | 4.64E+01        |
| 9.25E-02       | 3.89E+00        | 9.16E-02                     | 1.36E+01        | 9.12E-03                     | 3.26E+01        | 9.10E-03                     | 4.69E+01        |
| 1.11E-01       | 4.48E+00        | 1.10E-01                     | 1.44E+01        | 1.02E-02                     | 3.31E+01        | 1.02E-02                     | 4.74E+01        |
| 1.59E-01       | 6.25E+00        | 1.57E-01                     | 1.65E+01        | 2.07E-02                     | 3.48E+01        | 2.01E-02                     | 4.88E+01        |
| 2.08E-01       | 8.07E+00        | 2.06E-01                     | 1.86E+01        | 3.15E-02                     | 3.63E+01        | 3.05E-02                     | 5.03E+01        |
| 2.59E-01       | 9.78E+00        | 2.56E-01                     | 2.08E+01        | 3.96E-02                     | 3.72E+01        | 4.08E-02                     | 5.16E+01        |
| 3.09E-01       | 1.16E+01        | 3.06E-01                     | 2.30E+01        | 4.93E-02                     | 3.82E+01        | 5.11E-02                     | 5.29E+01        |
| 3.58E-01       | 1.35E+01        | 3.57E-01                     | 2.51E+01        | 5.95E-02                     | 3.91E+01        | 5.92E-02                     | 5.37E+01        |
| 4.09E-01       | 1.52E+01        | 4.07E-01                     | 2.69E+01        | 6.99E-02                     | 3.99E+01        | 7.14E-02                     | 5.49E+01        |
| 4.59E-01       | 1.69E+01        | 4.57E-01                     | 2.86E+01        | 7.98E-02                     | 4.07E+01        | 7.97E-02                     | 5.56E+01        |
| 5.08E-01       | 1.87E+01        | 5.08E-01                     | 3.03E+01        | 9.05E-02                     | 4.14E+01        | 8.95E-02                     | 5.64E+01        |
| 5.58E-01       | 2.03E+01        | 5.58E-01                     | 3.19E+01        | 1.08E-01                     | 4.25E+01        | 1.07E-01                     | 5.75E+01        |
| 6.09E-01       | 2.20E+01        | 6.08E-01                     | 3.35E+01        | 1.53E-01                     | 4.47E+01        | 1.51E-01                     | 5.98E+01        |
| 6.59E-01       | 2.36E+01        | 6.58E-01                     | 3.50E+01        | 2.03E-01                     | 4.70E+01        | 2.01E-01                     | 6.20E+01        |
| 7.08E-01       | 2.52E+01        | 7.08E-01                     | 3.65E+01        | 2.55E-01                     | 4.89E+01        | 2.52E-01                     | 6.41E+01        |
| 7.59E-01       | 2.68E+01        | 7.58E-01                     | 3.80E+01        | 3.05E-01                     | 5.09E+01        | 3.03E-01                     | 6.62E+01        |
| 8.09E-01       | 2.84E+01        | 8.08E-01                     | 3.94E+01        | 3.56E-01                     | 5.26E+01        | 3.55E-01                     | 6.78E+01        |
| 8.58E-01       | 3.00E+01        | 8.58E-01                     | 4.08E+01        | 4.07E-01                     | 5.39E+01        | 4.06E-01                     | 6.92E+01        |
| 9.09E-01       | 3.14E+01        | 9.08E-01                     | 4.23E+01        | 4.57E-01                     | 5.52E+01        | 4.57E-01                     | 7.03E+01        |
| 9.59E-01       | 3.29E+01        | 9.58E-01                     | 4.36E+01        | 5.08E-01                     | 5.62E+01        | 5.07E-01                     | 7.13E+01        |
| 9.99E-01       | 3.44E+01        | 9.99E-01                     | 4.49E+01        | 5.58E-01                     | 5.73E+01        | 5.57E-01                     | 7.23E+01        |
| 9.42E-01       | 3.27E+01        | 9.43E-01                     | 4.35E+01        | 6.08E-01                     | 5.84E+01        | 6.08E-01                     | 7.32E+01        |
| 8.90E-01       | 3.13E+01        | 8.91E-01                     | 4.24E+01        | 6.58E-01                     | 5.94E+01        | 6.59E-01                     | 7.40E+01        |
| 8.41E-01       | 3.00E+01        | 8.41E-01                     | 4.12E+01        | 7.09E-01                     | 6.02E+01        | 7.08E-01                     | 7.48E+01        |
| 7.91E-01       | 2.85E+01        | 7.91E-01                     | 3.99E+01        | 7.60E-01                     | 6.09E+01        | 7.59E-01                     | 7.55E+01        |
| 7.41E-01       | 2.69E+01        | 7.41E-01                     | 3.87E+01        | 8.09E-01                     | 6.18E+01        | 8.08E-01                     | 7.63E+01        |

|          |          |          |          |          |          |          |          |
|----------|----------|----------|----------|----------|----------|----------|----------|
| 6.91E-01 | 2.54E+01 | 6.92E-01 | 3.74E+01 | 8.59E-01 | 6.26E+01 | 8.60E-01 | 7.68E+01 |
| 6.41E-01 | 2.38E+01 | 6.41E-01 | 3.60E+01 | 9.09E-01 | 6.34E+01 | 9.08E-01 | 7.76E+01 |
| 5.91E-01 | 2.24E+01 | 5.92E-01 | 3.46E+01 | 9.60E-01 | 6.40E+01 | 9.60E-01 | 7.82E+01 |
| 5.41E-01 | 2.07E+01 | 5.42E-01 | 3.32E+01 | 9.99E-01 | 6.48E+01 | 9.99E-01 | 7.87E+01 |
| 4.91E-01 | 1.92E+01 | 4.92E-01 | 3.17E+01 | 9.40E-01 | 6.44E+01 | 9.41E-01 | 7.85E+01 |
| 4.42E-01 | 1.74E+01 | 4.42E-01 | 3.02E+01 | 8.89E-01 | 6.41E+01 | 8.88E-01 | 7.83E+01 |
| 3.91E-01 | 1.60E+01 | 3.92E-01 | 2.85E+01 | 8.39E-01 | 6.37E+01 | 8.39E-01 | 7.81E+01 |
| 3.41E-01 | 1.42E+01 | 3.42E-01 | 2.68E+01 | 7.89E-01 | 6.33E+01 | 7.89E-01 | 7.79E+01 |
| 2.92E-01 | 1.24E+01 | 2.93E-01 | 2.49E+01 | 7.39E-01 | 6.28E+01 | 7.39E-01 | 7.76E+01 |
| 2.42E-01 | 1.04E+01 | 2.43E-01 | 2.28E+01 | 6.89E-01 | 6.23E+01 | 6.89E-01 | 7.73E+01 |
| 1.91E-01 | 8.60E+00 | 1.94E-01 | 2.07E+01 | 6.40E-01 | 6.18E+01 | 6.39E-01 | 7.69E+01 |
| 1.41E-01 | 6.76E+00 | 1.44E-01 | 1.85E+01 | 5.90E-01 | 6.12E+01 | 5.89E-01 | 7.65E+01 |
|          |          | 9.41E-02 | 1.62E+01 | 5.40E-01 | 6.06E+01 | 5.39E-01 | 7.61E+01 |
|          |          | 4.24E-02 | 1.32E+01 | 4.90E-01 | 5.99E+01 | 4.89E-01 | 7.56E+01 |
|          |          |          |          | 4.40E-01 | 5.92E+01 | 4.40E-01 | 7.51E+01 |
|          |          |          |          | 3.90E-01 | 5.83E+01 | 3.90E-01 | 7.45E+01 |
|          |          |          |          | 3.41E-01 | 5.74E+01 | 3.40E-01 | 7.38E+01 |
|          |          |          |          | 2.92E-01 | 5.61E+01 | 2.91E-01 | 7.28E+01 |
|          |          |          |          | 2.43E-01 | 5.45E+01 | 2.42E-01 | 7.15E+01 |
|          |          |          |          | 1.93E-01 | 5.30E+01 | 1.93E-01 | 7.03E+01 |
|          |          |          |          | 1.43E-01 | 5.15E+01 | 1.43E-01 | 6.90E+01 |
|          |          |          |          | 9.54E-02 | 4.95E+01 | 9.52E-02 | 6.74E+01 |
|          |          |          |          | 4.64E-02 | 4.63E+01 | 4.75E-02 | 6.46E+01 |
|          |          |          |          | 7.51E-03 | 3.73E+01 | 8.38E-03 | 5.59E+01 |
|          |          |          |          |          |          | 4.53E-03 | 5.23E+01 |
|          |          |          |          |          |          | 9.87E-04 | 4.25E+01 |

---



**Table S9.** CO<sub>2</sub> adsorption and desorption data at 313 K.

| PAF-5          |                 | PEI (10 wt%) $\subset$ PAF-5 |                 | PEI (30 wt%) $\subset$ PAF-5 |                 | PEI (40 wt%) $\subset$ PAF-5 |                 |
|----------------|-----------------|------------------------------|-----------------|------------------------------|-----------------|------------------------------|-----------------|
| <i>P</i> (atm) | <i>V</i> (cc/g) | <i>P</i> (atm)               | <i>V</i> (cc/g) | <i>P</i> (atm)               | <i>V</i> (cc/g) | <i>P</i> (atm)               | <i>V</i> (cc/g) |
| 1.03E-03       | 7.00E-04        | 1.02E-03                     | 2.14E+00        | 1.03E-04                     | 5.28E+00        | 1.02E-04                     | 1.25E+01        |
| 2.02E-03       | 1.80E-02        | 2.04E-03                     | 3.19E+00        | 2.02E-04                     | 9.61E+00        | 2.02E-04                     | 1.91E+01        |
| 3.05E-03       | 3.67E-02        | 3.01E-03                     | 3.78E+00        | 3.03E-04                     | 1.20E+01        | 3.02E-04                     | 2.37E+01        |
| 4.01E-03       | 5.52E-02        | 4.10E-03                     | 4.31E+00        | 4.06E-04                     | 1.39E+01        | 4.01E-04                     | 2.62E+01        |
| 5.03E-03       | 7.53E-02        | 5.18E-03                     | 4.69E+00        | 5.04E-04                     | 1.50E+01        | 5.12E-04                     | 2.75E+01        |
| 6.03E-03       | 9.41E-02        | 6.08E-03                     | 4.97E+00        | 6.09E-04                     | 1.60E+01        | 6.08E-04                     | 2.87E+01        |
| 7.27E-03       | 1.19E-01        | 7.23E-03                     | 5.26E+00        | 7.12E-04                     | 1.66E+01        | 7.13E-04                     | 2.98E+01        |
| 9.30E-03       | 1.65E-01        | 8.30E-03                     | 5.53E+00        | 8.05E-04                     | 1.75E+01        | 8.05E-04                     | 3.11E+01        |
| 9.84E-03       | 1.74E-01        | 9.12E-03                     | 5.71E+00        | 9.03E-04                     | 1.81E+01        | 9.06E-04                     | 3.20E+01        |
| 1.25E-02       | 2.63E-01        | 1.01E-02                     | 5.90E+00        | 1.01E-03                     | 1.87E+01        | 1.01E-03                     | 3.26E+01        |
| 2.24E-02       | 5.10E-01        | 1.99E-02                     | 7.02E+00        | 2.01E-03                     | 2.21E+01        | 2.04E-03                     | 3.67E+01        |
| 3.25E-02       | 7.54E-01        | 3.06E-02                     | 7.91E+00        | 3.03E-03                     | 2.39E+01        | 3.04E-03                     | 3.87E+01        |
| 4.20E-02       | 1.01E+00        | 4.11E-02                     | 8.62E+00        | 4.06E-03                     | 2.51E+01        | 4.08E-03                     | 3.98E+01        |
| 5.21E-02       | 1.24E+00        | 5.13E-02                     | 9.24E+00        | 5.07E-03                     | 2.60E+01        | 5.00E-03                     | 4.11E+01        |
| 6.24E-02       | 1.40E+00        | 6.15E-02                     | 9.81E+00        | 6.19E-03                     | 2.69E+01        | 6.07E-03                     | 4.20E+01        |
| 7.22E-02       | 1.63E+00        | 7.16E-02                     | 1.03E+01        | 7.24E-03                     | 2.75E+01        | 7.12E-03                     | 4.27E+01        |
| 8.21E-02       | 1.85E+00        | 8.17E-02                     | 1.08E+01        | 8.08E-03                     | 2.80E+01        | 8.01E-03                     | 4.31E+01        |
| 9.26E-02       | 2.09E+00        | 9.18E-02                     | 1.12E+01        | 9.03E-03                     | 2.85E+01        | 9.13E-03                     | 4.38E+01        |
| 1.11E-01       | 2.59E+00        | 1.10E-01                     | 1.20E+01        | 1.01E-02                     | 2.90E+01        | 1.03E-02                     | 4.43E+01        |
| 1.59E-01       | 3.91E+00        | 1.57E-01                     | 1.37E+01        | 2.06E-02                     | 3.10E+01        | 1.98E-02                     | 4.61E+01        |
| 2.11E-01       | 4.70E+00        | 2.07E-01                     | 1.54E+01        | 3.12E-02                     | 3.27E+01        | 2.95E-02                     | 4.77E+01        |
| 2.60E-01       | 5.98E+00        | 2.57E-01                     | 1.71E+01        | 3.95E-02                     | 3.37E+01        | 3.91E-02                     | 4.87E+01        |
| 3.10E-01       | 7.26E+00        | 3.07E-01                     | 1.90E+01        | 4.94E-02                     | 3.47E+01        | 5.01E-02                     | 5.03E+01        |
| 3.60E-01       | 8.50E+00        | 3.58E-01                     | 2.07E+01        | 5.95E-02                     | 3.57E+01        | 6.15E-02                     | 5.15E+01        |
| 4.10E-01       | 9.66E+00        | 4.08E-01                     | 2.21E+01        | 6.99E-02                     | 3.65E+01        | 7.05E-02                     | 5.21E+01        |
| 4.60E-01       | 1.08E+01        | 4.59E-01                     | 2.35E+01        | 8.10E-02                     | 3.71E+01        | 7.93E-02                     | 5.29E+01        |
| 5.10E-01       | 1.20E+01        | 5.09E-01                     | 2.48E+01        | 9.07E-02                     | 3.78E+01        | 8.95E-02                     | 5.37E+01        |
| 5.59E-01       | 1.32E+01        | 5.59E-01                     | 2.61E+01        | 1.08E-01                     | 3.89E+01        | 1.07E-01                     | 5.47E+01        |
| 6.09E-01       | 1.44E+01        | 6.09E-01                     | 2.73E+01        | 1.54E-01                     | 4.10E+01        | 1.55E-01                     | 5.64E+01        |
| 6.60E-01       | 1.56E+01        | 6.59E-01                     | 2.85E+01        | 2.05E-01                     | 4.29E+01        | 2.01E-01                     | 5.87E+01        |
| 7.09E-01       | 1.66E+01        | 7.09E-01                     | 2.97E+01        | 2.55E-01                     | 4.48E+01        | 2.53E-01                     | 6.07E+01        |
| 7.60E-01       | 1.77E+01        | 7.59E-01                     | 3.08E+01        | 3.05E-01                     | 4.70E+01        | 3.04E-01                     | 6.27E+01        |
| 8.09E-01       | 1.89E+01        | 8.09E-01                     | 3.19E+01        | 3.57E-01                     | 4.84E+01        | 3.57E-01                     | 6.40E+01        |
| 8.59E-01       | 2.00E+01        | 8.60E-01                     | 3.30E+01        | 4.08E-01                     | 4.95E+01        | 4.06E-01                     | 6.54E+01        |
| 9.09E-01       | 2.10E+01        | 9.09E-01                     | 3.42E+01        | 4.57E-01                     | 5.07E+01        | 4.56E-01                     | 6.66E+01        |
| 9.60E-01       | 2.20E+01        | 9.60E-01                     | 3.52E+01        | 5.09E-01                     | 5.17E+01        | 5.09E-01                     | 6.74E+01        |
| 9.99E-01       | 2.31E+01        | 9.99E-01                     | 3.62E+01        | 5.58E-01                     | 5.27E+01        | 5.57E-01                     | 6.84E+01        |
| 9.40E-01       | 2.18E+01        | 9.43E-01                     | 3.52E+01        | 6.09E-01                     | 5.36E+01        | 6.08E-01                     | 6.93E+01        |
| 8.89E-01       | 2.09E+01        | 8.91E-01                     | 3.42E+01        | 6.60E-01                     | 5.43E+01        | 6.59E-01                     | 7.00E+01        |
| 8.40E-01       | 2.02E+01        | 8.41E-01                     | 3.33E+01        | 7.09E-01                     | 5.50E+01        | 7.08E-01                     | 7.09E+01        |
| 7.90E-01       | 1.90E+01        | 7.91E-01                     | 3.24E+01        | 7.58E-01                     | 5.61E+01        | 7.59E-01                     | 7.15E+01        |

|          |          |          |          |          |          |          |          |
|----------|----------|----------|----------|----------|----------|----------|----------|
| 7.40E-01 | 1.79E+01 | 7.41E-01 | 3.15E+01 | 8.10E-01 | 5.68E+01 | 8.09E-01 | 7.22E+01 |
| 6.90E-01 | 1.68E+01 | 6.91E-01 | 3.05E+01 | 8.61E-01 | 5.72E+01 | 8.60E-01 | 7.27E+01 |
| 6.39E-01 | 1.58E+01 | 6.41E-01 | 2.94E+01 | 9.10E-01 | 5.79E+01 | 9.10E-01 | 7.31E+01 |
| 5.90E-01 | 1.47E+01 | 5.91E-01 | 2.83E+01 | 9.59E-01 | 5.87E+01 | 9.58E-01 | 7.39E+01 |
| 5.40E-01 | 1.37E+01 | 5.41E-01 | 2.72E+01 | 9.99E-01 | 5.93E+01 | 9.99E-01 | 7.44E+01 |
| 4.90E-01 | 1.26E+01 | 4.91E-01 | 2.61E+01 | 9.40E-01 | 5.90E+01 | 9.41E-01 | 7.42E+01 |
| 4.41E-01 | 1.14E+01 | 4.41E-01 | 2.49E+01 | 8.89E-01 | 5.86E+01 | 8.88E-01 | 7.41E+01 |
| 3.90E-01 | 1.05E+01 | 3.91E-01 | 2.36E+01 | 8.39E-01 | 5.83E+01 | 8.39E-01 | 7.39E+01 |
| 3.40E-01 | 9.30E+00 | 3.42E-01 | 2.22E+01 | 7.89E-01 | 5.80E+01 | 7.89E-01 | 7.36E+01 |
| 2.90E-01 | 8.06E+00 | 2.92E-01 | 2.06E+01 | 7.40E-01 | 5.75E+01 | 7.39E-01 | 7.34E+01 |
| 2.41E-01 | 6.76E+00 | 2.43E-01 | 1.88E+01 | 6.89E-01 | 5.70E+01 | 6.89E-01 | 7.30E+01 |
| 1.89E-01 | 5.92E+00 | 1.93E-01 | 1.71E+01 | 6.39E-01 | 5.65E+01 | 6.39E-01 | 7.27E+01 |
| 1.39E-01 | 4.65E+00 | 1.43E-01 | 1.53E+01 | 5.89E-01 | 5.60E+01 | 5.89E-01 | 7.23E+01 |
|          |          | 9.35E-02 | 1.34E+01 | 5.40E-01 | 5.55E+01 | 5.39E-01 | 7.19E+01 |
|          |          | 4.18E-02 | 1.06E+01 | 4.90E-01 | 5.49E+01 | 4.91E-01 | 7.12E+01 |
|          |          |          |          | 4.40E-01 | 5.42E+01 | 4.40E-01 | 7.07E+01 |
|          |          |          |          | 3.90E-01 | 5.34E+01 | 3.90E-01 | 7.01E+01 |
|          |          |          |          | 3.42E-01 | 5.23E+01 | 3.41E-01 | 6.94E+01 |
|          |          |          |          | 2.91E-01 | 5.12E+01 | 2.92E-01 | 6.84E+01 |
|          |          |          |          | 2.42E-01 | 4.97E+01 | 2.44E-01 | 6.69E+01 |
|          |          |          |          | 1.93E-01 | 4.81E+01 | 1.94E-01 | 6.55E+01 |
|          |          |          |          | 1.44E-01 | 4.64E+01 | 1.44E-01 | 6.42E+01 |
|          |          |          |          | 9.70E-02 | 4.41E+01 | 9.81E-02 | 6.21E+01 |
|          |          |          |          | 4.86E-02 | 4.05E+01 | 5.10E-02 | 5.87E+01 |
|          |          |          |          | 8.03E-03 | 3.09E+01 | 7.88E-03 | 4.79E+01 |
|          |          |          |          |          |          | 4.46E-03 | 4.42E+01 |
|          |          |          |          |          |          | 9.77E-04 | 3.40E+01 |

---

**Table S10.** CO<sub>2</sub> adsorption and desorption data at 323 K.

| PAF-5          |                 | PEI (10 wt%) $\subset$ PAF-5 |                 | PEI (30 wt%) $\subset$ PAF-5 |                 | PEI (40 wt%) $\subset$ PAF-5 |                 |
|----------------|-----------------|------------------------------|-----------------|------------------------------|-----------------|------------------------------|-----------------|
| <i>P</i> (atm) | <i>V</i> (cc/g) | <i>P</i> (atm)               | <i>V</i> (cc/g) | <i>P</i> (atm)               | <i>V</i> (cc/g) | <i>P</i> (atm)               | <i>V</i> (cc/g) |
| 1.10E-03       | 5.90E-03        | 1.03E-03                     | 8.61E-01        | 1.04E-04                     | 9.48E-01        | 1.04E-04                     | 2.31E+00        |
| 2.11E-03       | 3.00E-02        | 2.08E-03                     | 1.59E+00        | 2.07E-04                     | 2.67E+00        | 2.02E-04                     | 6.32E+00        |
| 3.19E-03       | 5.33E-02        | 3.04E-03                     | 2.06E+00        | 3.04E-04                     | 4.60E+00        | 3.02E-04                     | 1.07E+01        |
| 4.26E-03       | 7.64E-02        | 4.19E-03                     | 2.49E+00        | 4.08E-04                     | 6.07E+00        | 4.07E-04                     | 1.38E+01        |
| 5.33E-03       | 1.01E-01        | 5.15E-03                     | 2.80E+00        | 5.02E-04                     | 7.43E+00        | 5.13E-04                     | 1.67E+01        |
| 6.41E-03       | 1.23E-01        | 6.25E-03                     | 3.10E+00        | 6.05E-04                     | 8.87E+00        | 6.10E-04                     | 1.87E+01        |
| 7.49E-03       | 1.47E-01        | 7.25E-03                     | 3.40E+00        | 7.03E-04                     | 9.99E+00        | 7.05E-04                     | 2.06E+01        |
| 8.55E-03       | 1.70E-01        | 8.12E-03                     | 3.59E+00        | 8.07E-04                     | 1.10E+01        | 8.08E-04                     | 2.23E+01        |
| 9.62E-03       | 1.95E-01        | 9.17E-03                     | 3.80E+00        | 9.08E-04                     | 1.18E+01        | 9.08E-04                     | 2.38E+01        |
| 1.07E-02       | 2.19E-01        | 1.02E-02                     | 4.01E+00        | 1.05E-03                     | 1.27E+01        | 1.00E-03                     | 2.50E+01        |
| 2.26E-02       | 5.07E-01        | 2.06E-02                     | 5.19E+00        | 2.06E-03                     | 1.74E+01        | 2.10E-03                     | 3.15E+01        |
| 3.24E-02       | 7.34E-01        | 3.11E-02                     | 6.05E+00        | 3.01E-03                     | 1.99E+01        | 3.06E-03                     | 3.48E+01        |
| 4.26E-02       | 9.81E-01        | 4.14E-02                     | 6.78E+00        | 4.14E-03                     | 2.16E+01        | 4.06E-03                     | 3.69E+01        |
| 5.25E-02       | 1.23E+00        | 5.16E-02                     | 7.42E+00        | 5.06E-03                     | 2.26E+01        | 5.03E-03                     | 3.76E+01        |
| 6.26E-02       | 1.48E+00        | 6.18E-02                     | 7.97E+00        | 6.06E-03                     | 2.36E+01        | 6.22E-03                     | 3.92E+01        |
| 7.26E-02       | 1.72E+00        | 7.20E-02                     | 8.46E+00        | 7.16E-03                     | 2.43E+01        | 7.11E-03                     | 4.01E+01        |
| 8.26E-02       | 1.98E+00        | 8.19E-02                     | 8.96E+00        | 8.04E-03                     | 2.51E+01        | 8.06E-03                     | 4.10E+01        |
| 9.26E-02       | 2.22E+00        | 9.21E-02                     | 9.40E+00        | 9.28E-03                     | 2.57E+01        | 9.29E-03                     | 4.16E+01        |
| 1.11E-01       | 2.66E+00        | 1.11E-01                     | 1.01E+01        | 1.02E-02                     | 2.62E+01        | 1.03E-02                     | 4.23E+01        |
| 1.60E-01       | 3.79E+00        | 1.59E-01                     | 1.17E+01        | 2.02E-02                     | 2.87E+01        | 1.91E-02                     | 4.47E+01        |
| 2.09E-01       | 5.00E+00        | 2.08E-01                     | 1.34E+01        | 3.06E-02                     | 3.05E+01        | 2.99E-02                     | 4.65E+01        |
| 2.58E-01       | 6.58E+00        | 2.58E-01                     | 1.54E+01        | 3.94E-02                     | 3.16E+01        | 4.03E-02                     | 4.80E+01        |
| 3.08E-01       | 8.32E+00        | 3.08E-01                     | 1.75E+01        | 4.91E-02                     | 3.27E+01        | 5.14E-02                     | 4.93E+01        |
| 3.59E-01       | 9.62E+00        | 3.59E-01                     | 1.91E+01        | 6.02E-02                     | 3.35E+01        | 6.05E-02                     | 5.00E+01        |
| 4.10E-01       | 1.08E+01        | 4.09E-01                     | 2.04E+01        | 6.94E-02                     | 3.45E+01        | 6.91E-02                     | 5.09E+01        |
| 4.60E-01       | 1.19E+01        | 4.59E-01                     | 2.17E+01        | 8.11E-02                     | 3.51E+01        | 7.99E-02                     | 5.16E+01        |
| 5.10E-01       | 1.29E+01        | 5.10E-01                     | 2.29E+01        | 9.12E-02                     | 3.56E+01        | 8.95E-02                     | 5.24E+01        |
| 5.60E-01       | 1.39E+01        | 5.60E-01                     | 2.40E+01        | 1.07E-01                     | 3.69E+01        | 1.08E-01                     | 5.33E+01        |
| 6.10E-01       | 1.49E+01        | 6.10E-01                     | 2.52E+01        | 1.57E-01                     | 3.85E+01        | 1.53E-01                     | 5.52E+01        |
| 6.60E-01       | 1.59E+01        | 6.60E-01                     | 2.63E+01        | 2.04E-01                     | 4.06E+01        | 2.03E-01                     | 5.71E+01        |
| 7.10E-01       | 1.69E+01        | 7.10E-01                     | 2.74E+01        | 2.55E-01                     | 4.25E+01        | 2.55E-01                     | 5.87E+01        |
| 7.60E-01       | 1.78E+01        | 7.60E-01                     | 2.84E+01        | 3.07E-01                     | 4.42E+01        | 3.05E-01                     | 6.05E+01        |
| 8.10E-01       | 1.88E+01        | 8.09E-01                     | 2.95E+01        | 3.56E-01                     | 4.59E+01        | 3.56E-01                     | 6.20E+01        |
| 8.60E-01       | 1.98E+01        | 8.60E-01                     | 3.04E+01        | 4.08E-01                     | 4.70E+01        | 4.09E-01                     | 6.28E+01        |
| 9.10E-01       | 2.06E+01        | 9.10E-01                     | 3.14E+01        | 4.59E-01                     | 4.78E+01        | 4.55E-01                     | 6.41E+01        |
| 9.60E-01       | 2.16E+01        | 9.59E-01                     | 3.25E+01        | 5.07E-01                     | 4.90E+01        | 5.09E-01                     | 6.49E+01        |
| 9.99E-01       | 2.23E+01        | 9.99E-01                     | 3.33E+01        | 5.61E-01                     | 4.96E+01        | 5.58E-01                     | 6.57E+01        |
| 9.43E-01       | 2.14E+01        | 9.42E-01                     | 3.24E+01        | 6.06E-01                     | 5.09E+01        | 6.10E-01                     | 6.63E+01        |
| 8.90E-01       | 2.06E+01        | 8.89E-01                     | 3.16E+01        | 6.60E-01                     | 5.15E+01        | 6.58E-01                     | 6.70E+01        |
| 8.40E-01       | 1.98E+01        | 8.40E-01                     | 3.08E+01        | 7.10E-01                     | 5.21E+01        | 7.09E-01                     | 6.76E+01        |
| 7.90E-01       | 1.90E+01        | 7.90E-01                     | 2.97E+01        | 7.59E-01                     | 5.29E+01        | 7.60E-01                     | 6.81E+01        |

|          |          |          |          |          |          |          |          |
|----------|----------|----------|----------|----------|----------|----------|----------|
| 7.40E-01 | 1.81E+01 | 7.39E-01 | 2.89E+01 | 8.10E-01 | 5.35E+01 | 8.09E-01 | 6.87E+01 |
| 6.90E-01 | 1.73E+01 | 6.89E-01 | 2.81E+01 | 8.60E-01 | 5.41E+01 | 8.61E-01 | 6.91E+01 |
| 6.40E-01 | 1.64E+01 | 6.40E-01 | 2.72E+01 | 9.09E-01 | 5.50E+01 | 9.09E-01 | 6.97E+01 |
| 5.90E-01 | 1.54E+01 | 5.90E-01 | 2.62E+01 | 9.61E-01 | 5.53E+01 | 9.60E-01 | 7.02E+01 |
| 5.40E-01 | 1.45E+01 | 5.40E-01 | 2.52E+01 | 9.99E-01 | 5.61E+01 | 9.99E-01 | 7.06E+01 |
| 4.90E-01 | 1.35E+01 | 4.90E-01 | 2.41E+01 | 9.39E-01 | 5.58E+01 | 9.40E-01 | 7.06E+01 |
| 4.40E-01 | 1.25E+01 | 4.40E-01 | 2.30E+01 | 8.89E-01 | 5.55E+01 | 8.88E-01 | 7.05E+01 |
| 3.90E-01 | 1.14E+01 | 3.90E-01 | 2.18E+01 | 8.39E-01 | 5.50E+01 | 8.39E-01 | 7.02E+01 |
| 3.40E-01 | 1.03E+01 | 3.40E-01 | 2.05E+01 | 7.89E-01 | 5.47E+01 | 7.89E-01 | 7.00E+01 |
| 2.91E-01 | 8.98E+00 | 2.91E-01 | 1.90E+01 | 7.39E-01 | 5.44E+01 | 7.38E-01 | 6.99E+01 |
| 2.42E-01 | 7.24E+00 | 2.42E-01 | 1.69E+01 | 6.89E-01 | 5.40E+01 | 6.89E-01 | 6.97E+01 |
| 1.91E-01 | 5.70E+00 | 1.92E-01 | 1.50E+01 | 6.40E-01 | 5.33E+01 | 6.39E-01 | 6.94E+01 |
| 1.41E-01 | 4.47E+00 | 1.41E-01 | 1.33E+01 | 5.89E-01 | 5.28E+01 | 5.89E-01 | 6.91E+01 |
| 9.07E-02 | 3.26E+00 | 9.21E-02 | 1.14E+01 | 5.39E-01 | 5.23E+01 | 5.40E-01 | 6.86E+01 |
| 3.52E-02 | 1.79E+00 | 3.93E-02 | 8.54E+00 | 4.90E-01 | 5.18E+01 | 4.90E-01 | 6.82E+01 |
| 5.72E-03 | 8.41E-01 | 9.74E-03 | 4.96E+00 | 4.40E-01 | 5.11E+01 | 4.40E-01 | 6.77E+01 |
|          |          |          |          | 3.91E-01 | 5.02E+01 | 3.91E-01 | 6.70E+01 |
|          |          |          |          | 3.42E-01 | 4.91E+01 | 3.40E-01 | 6.63E+01 |
|          |          |          |          | 2.92E-01 | 4.79E+01 | 2.92E-01 | 6.53E+01 |
|          |          |          |          | 2.43E-01 | 4.64E+01 | 2.44E-01 | 6.38E+01 |
|          |          |          |          | 1.94E-01 | 4.47E+01 | 1.93E-01 | 6.26E+01 |
|          |          |          |          | 1.44E-01 | 4.31E+01 | 1.45E-01 | 6.10E+01 |
|          |          |          |          | 9.80E-02 | 4.06E+01 | 9.87E-02 | 5.88E+01 |
|          |          |          |          | 4.93E-02 | 3.68E+01 | 5.12E-02 | 5.53E+01 |
|          |          |          |          | 8.42E-03 | 2.69E+01 | 7.93E-03 | 4.32E+01 |

---
